# Supplementary material for: Polyphenolic Compounds Isolated from Marine Algae Attenuate the Replication of SARS-CoV-2 in the Host Cell through a Multi-Target Approach of 3CLpro and PLpro
Source: MDPI journal article supplement (doi:10.3390/md20120786), 2022-12-19
Supplement: s1 [file s1]

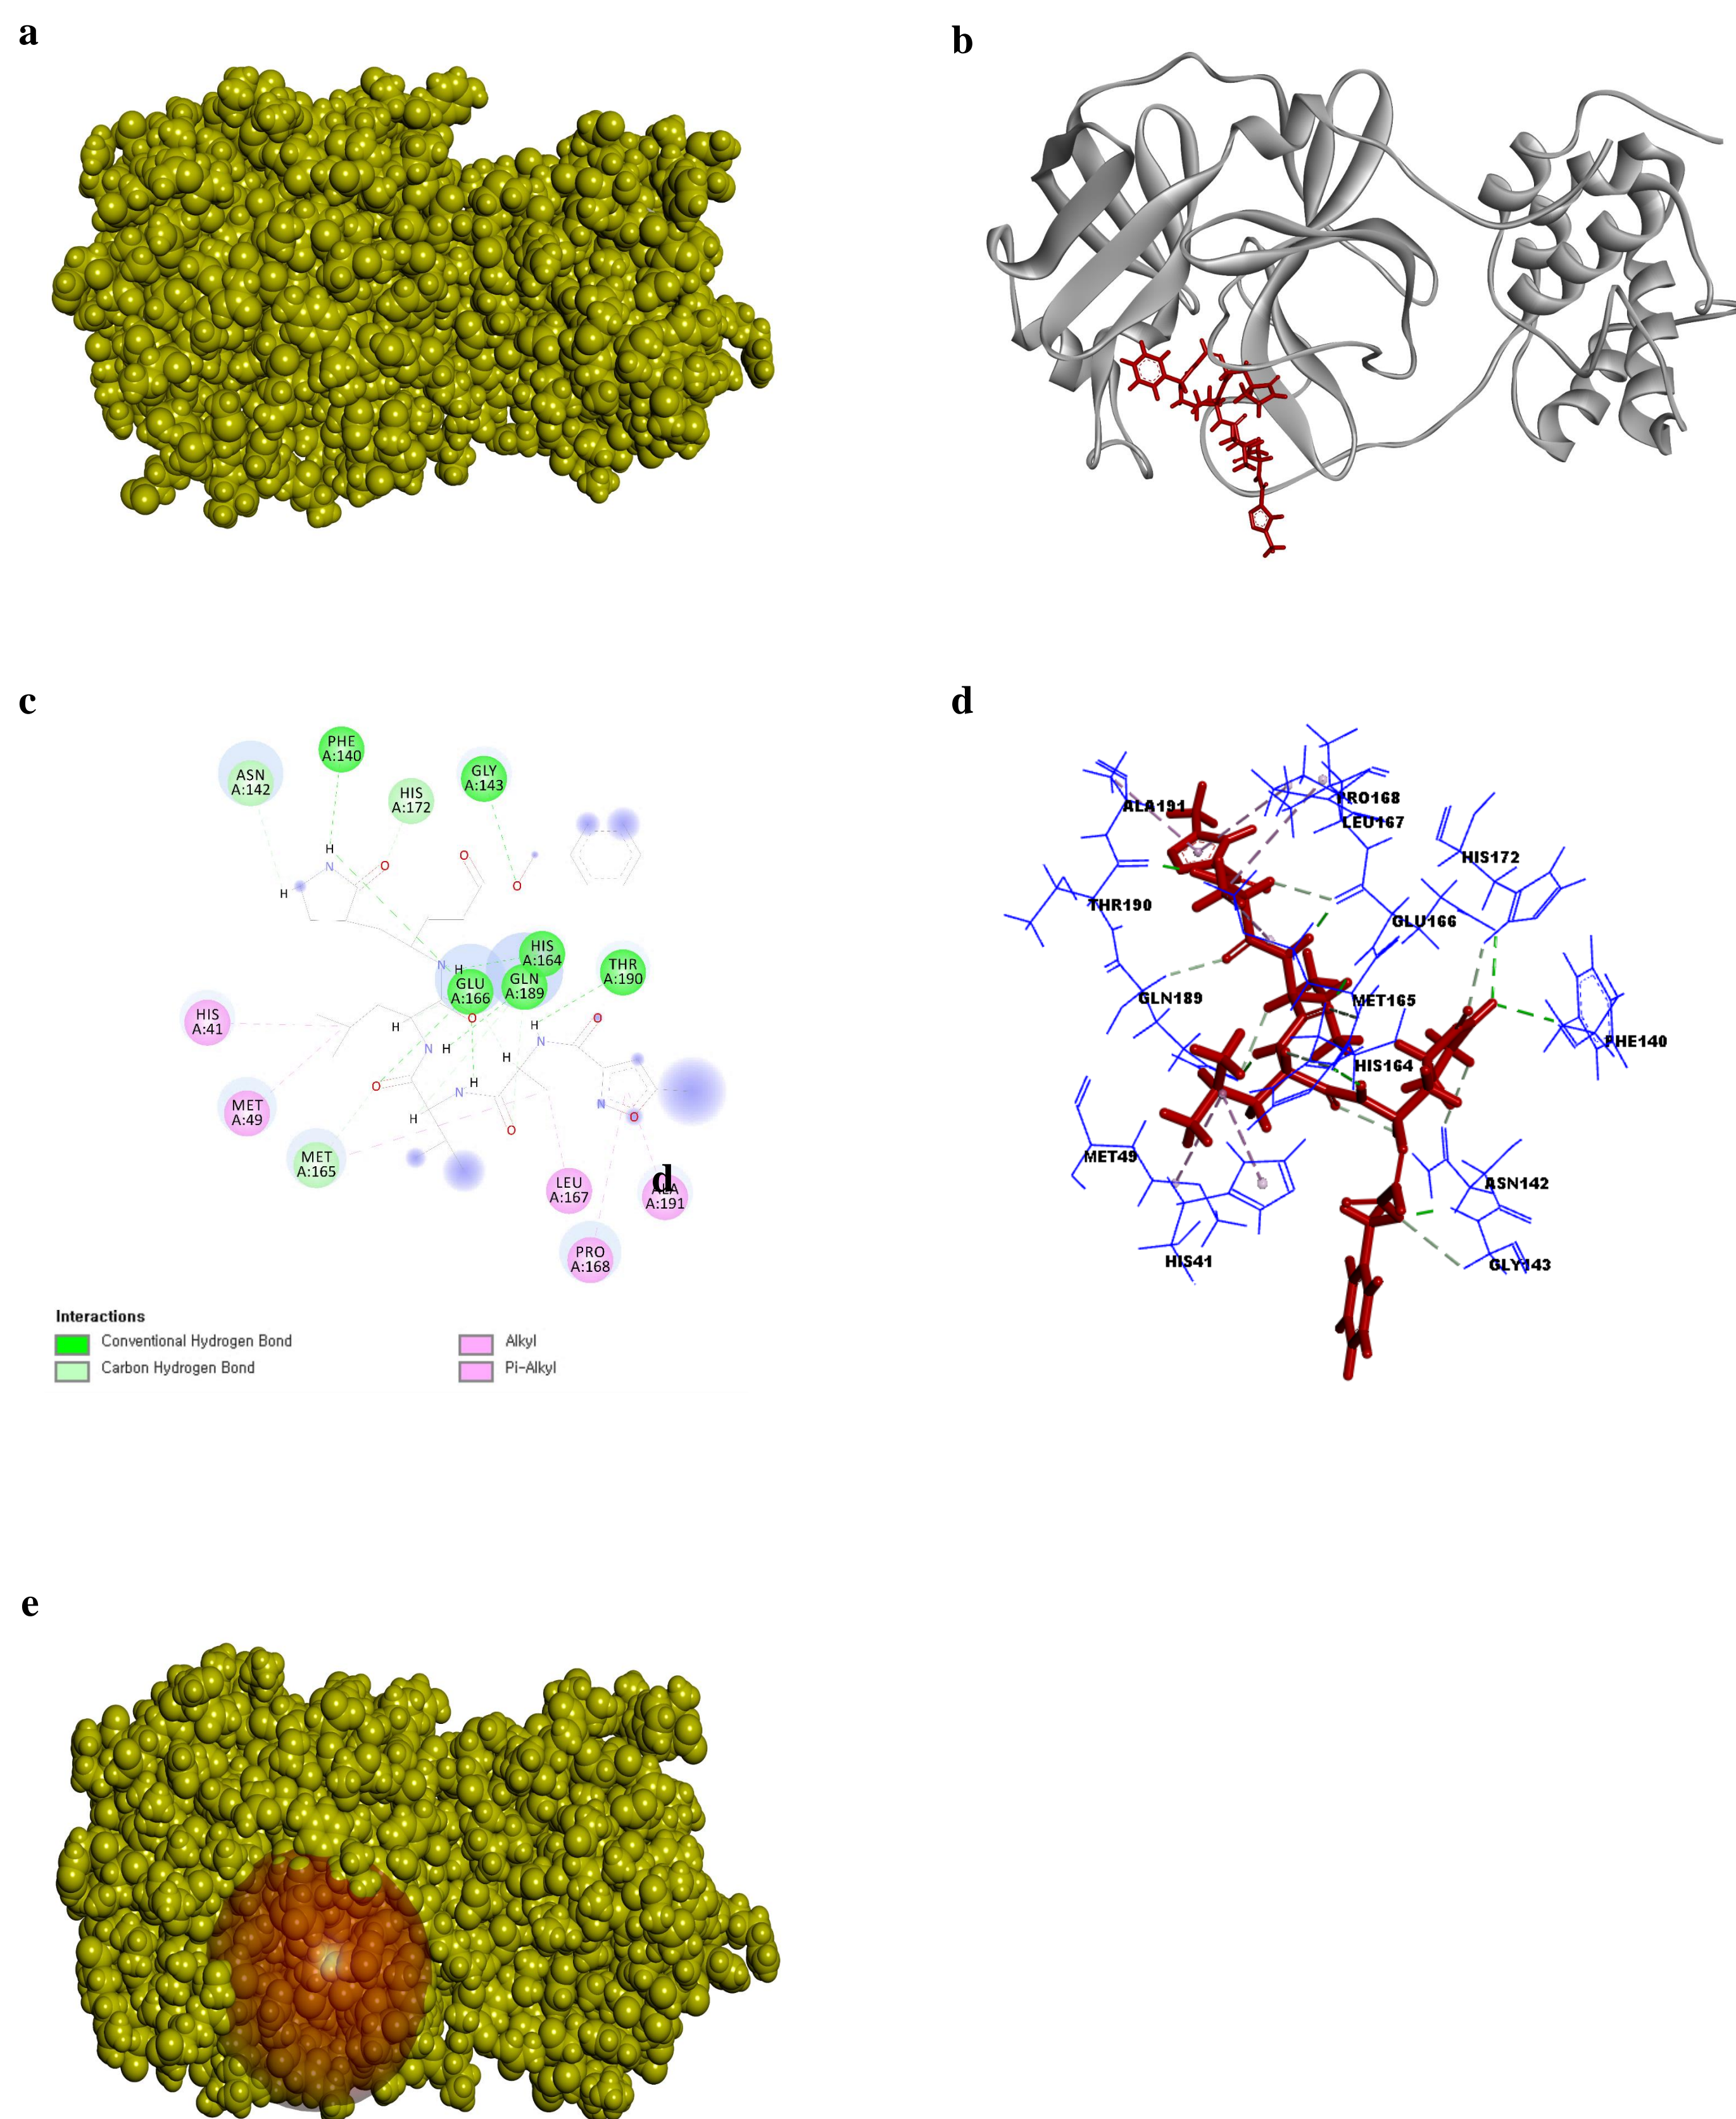

**Supplementary Figure S1. *In-silico* analysis of 3CL<sup>pro</sup> with N3 inhibitor,** a) Surface representation 3CL<sup>pro</sup> and N3 inhibitor ligand complex 3CL<sup>pro</sup> receptor protein is in yellow color and N3 inhibitor in red color. b) Cartoon representation of 3CL<sup>pro</sup> and N3 inhibitor ligand complex. 3CL<sup>pro</sup> receptor protein is in yellow color and N3 inhibitor is in red color. c) 2D representation of ligand interaction between 3CL<sup>pro</sup> and N3 inhibitor. d) 3D representation of ligand interaction between 3CL<sup>pro</sup> and N3 inhibitor. e) Prepared active site of 3CL<sup>pro</sup>.



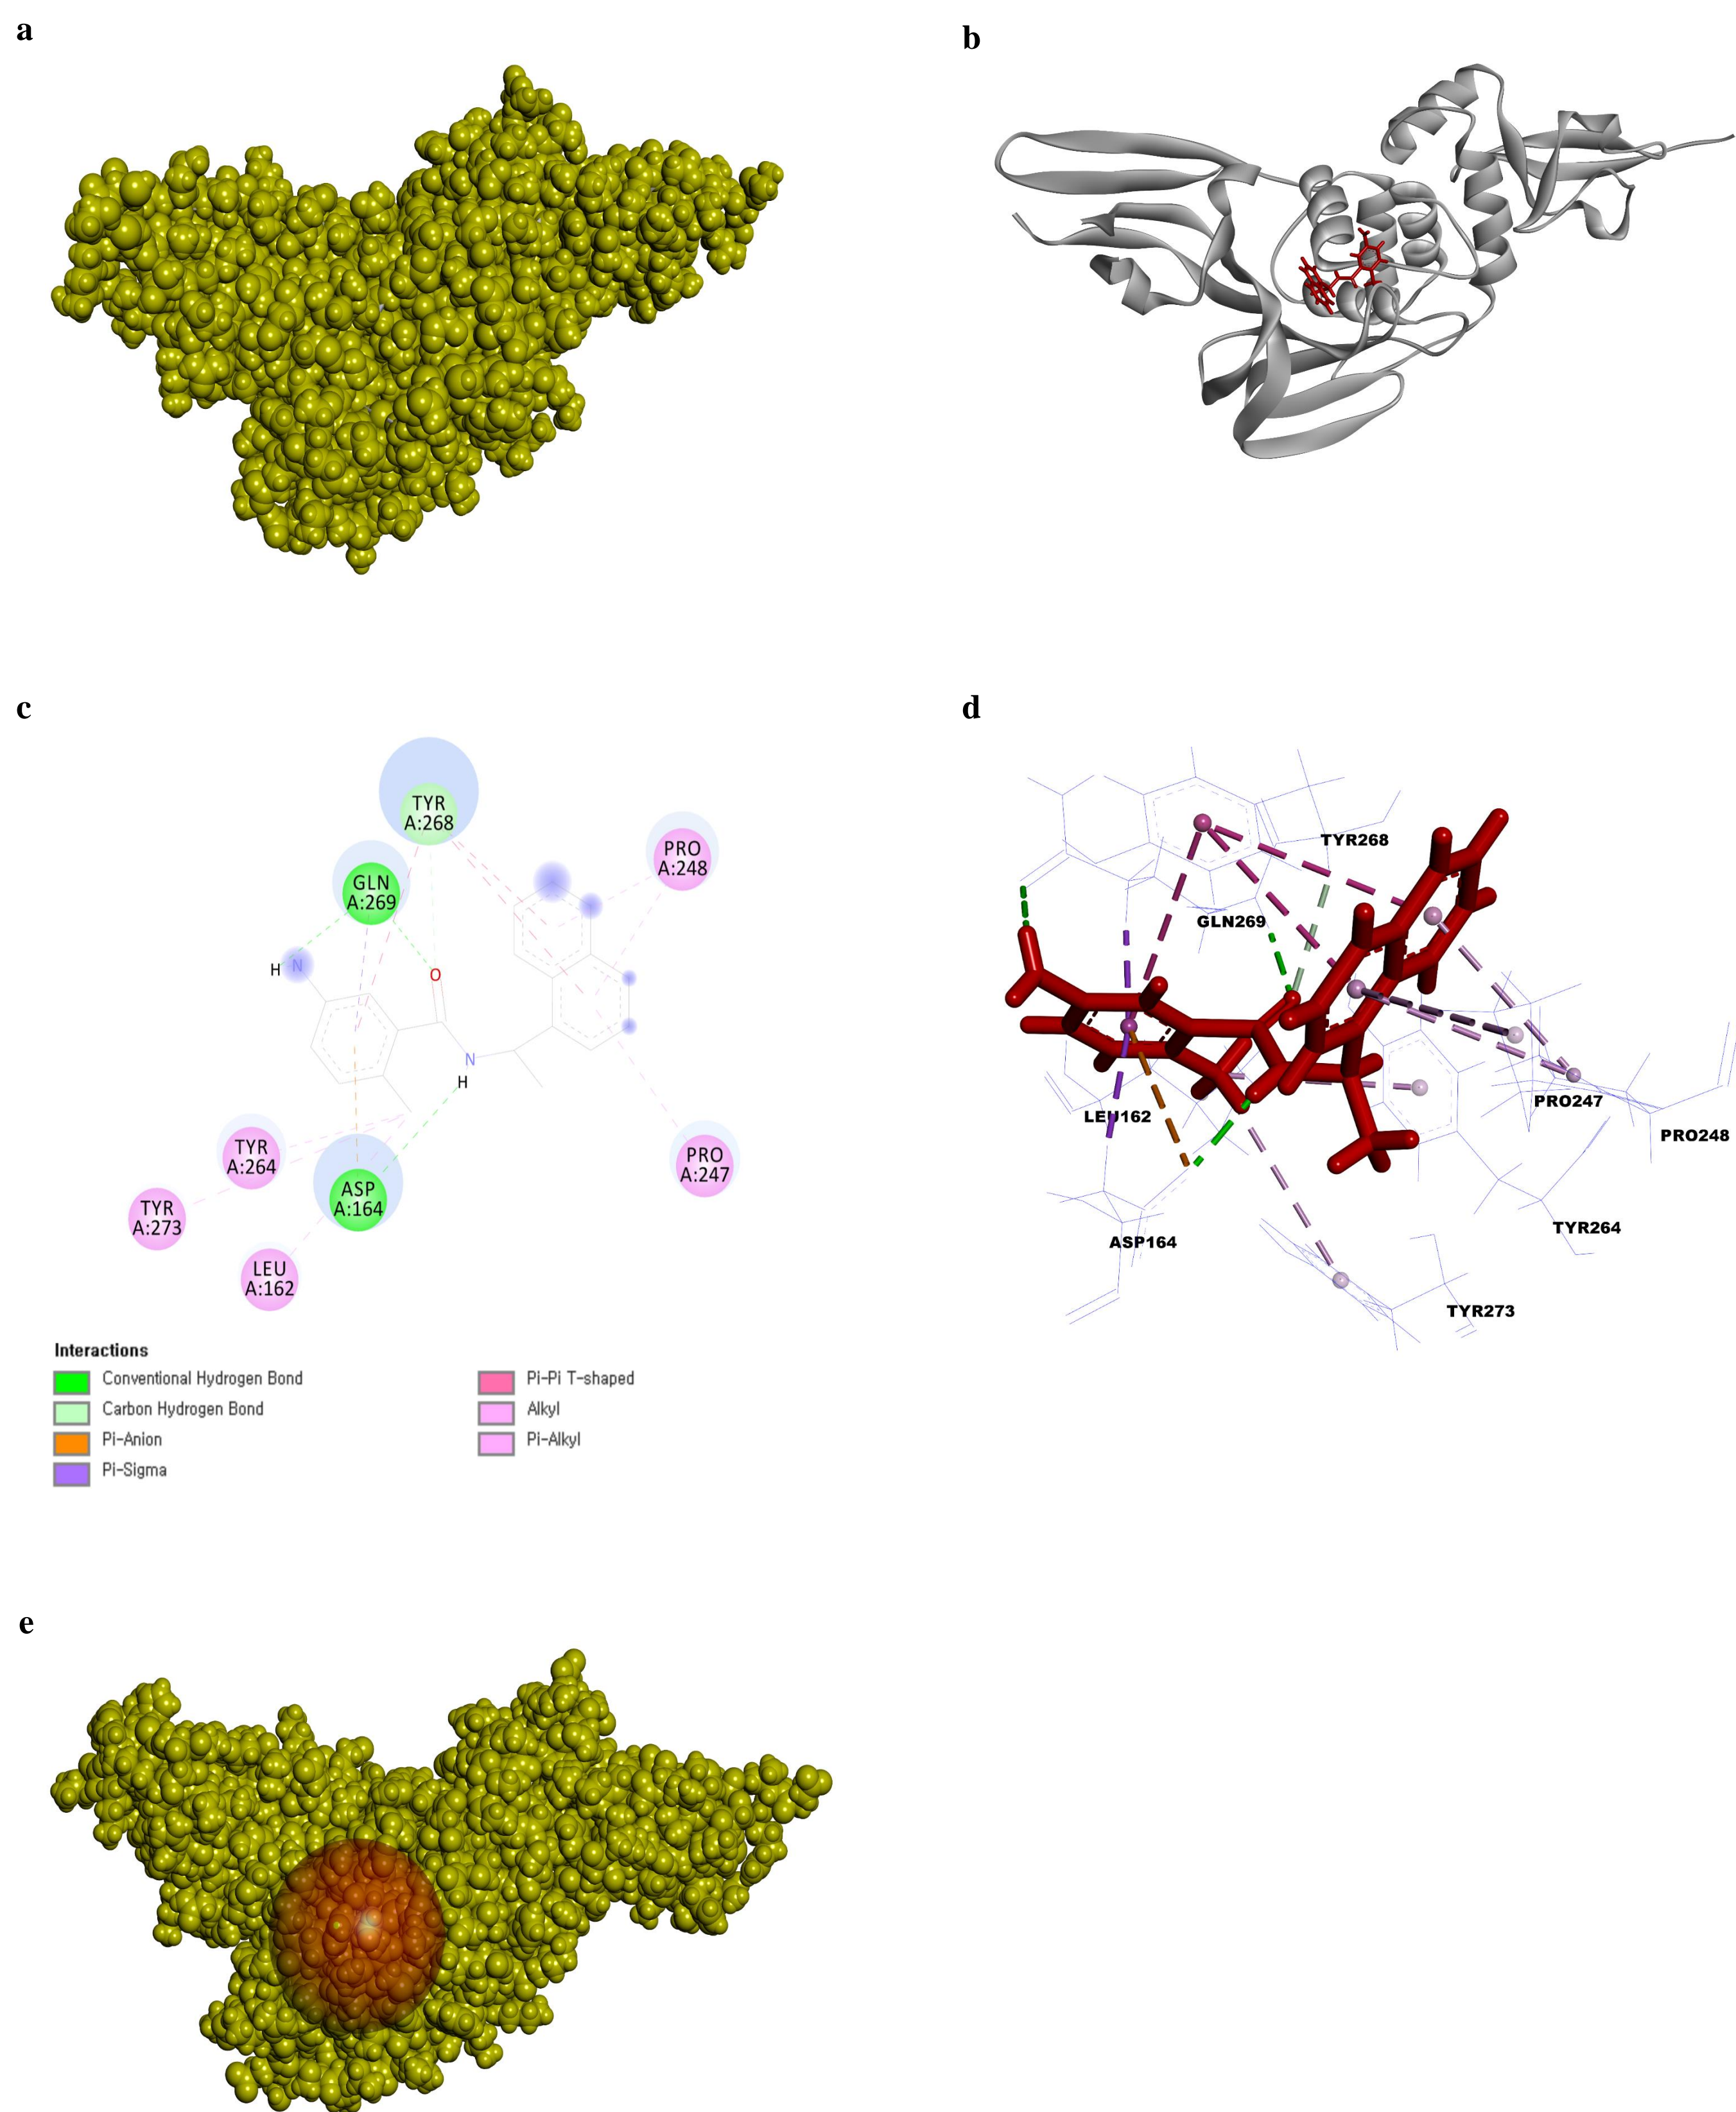

**Supplementary Figure S2. *In-silico* analysis of PL<sup>pro</sup> with GRL0617 inhibitor,** a) Surface representation PL<sup>pro</sup> and GRL0617 inhibitor ligand complex PL<sup>pro</sup> receptor protein is in yellow color and GRL0617 inhibitor in red color. b) Cartoon representation of PL<sup>pro</sup> and GRL0617 inhibitor ligand complex. PL<sup>pro</sup> receptor protein is in yellow color and GRL0617 inhibitor is in red color. c) 2D representation of ligand interaction between PL<sup>pro</sup> and GRL0617 inhibitor. d) 3D representation of ligand interaction between PL<sup>pro</sup> and GRL0617 inhibitor. e) Prepared active site of PL<sup>pro</sup>.



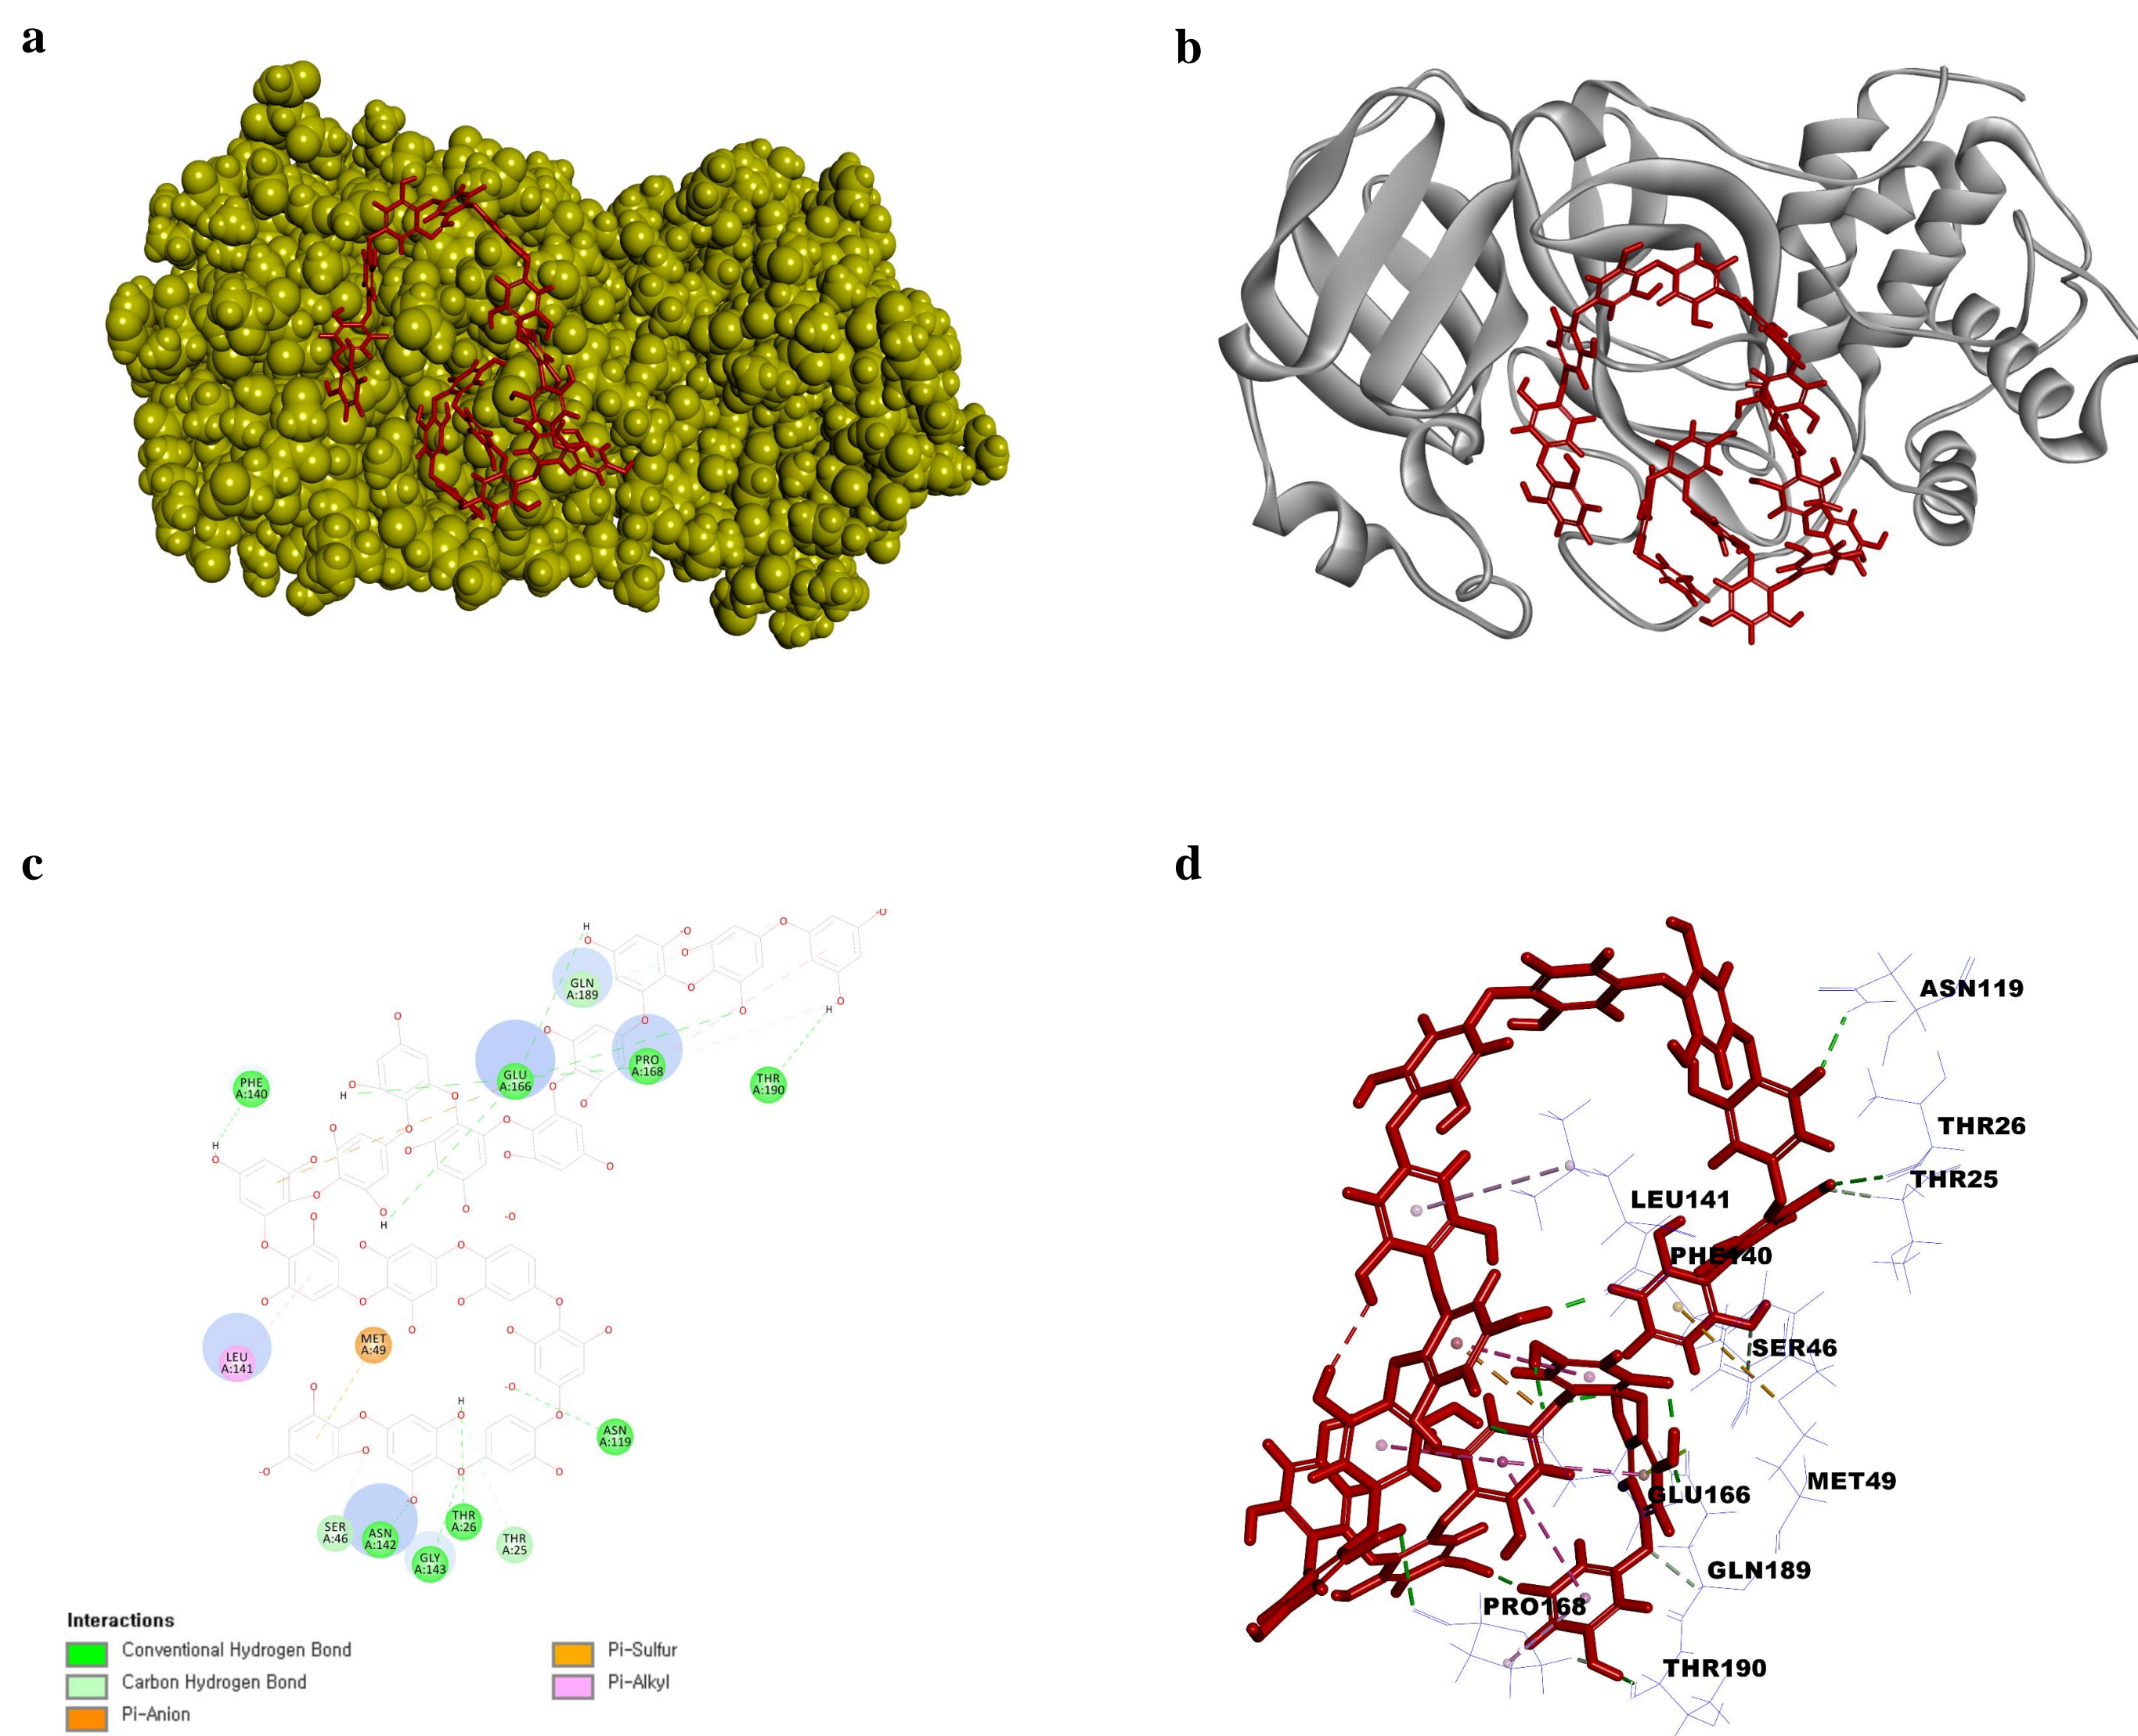

**Supplementary Figure S3. *In-silico* analysis of 3CL<sup>pro</sup> with (Ishophloroglucinol A) IPA, a) 3D representation of docking pose of IPA with 3CL<sup>pro</sup>. b) Cartoon representation of docking pose of IPA with 3CL<sup>pro</sup>. c) 2D representation of Ligand interaction of IPA with 3CL<sup>pro</sup>. d) 3D representation of Ligand interaction of IPA with 3CL<sup>pro</sup>**



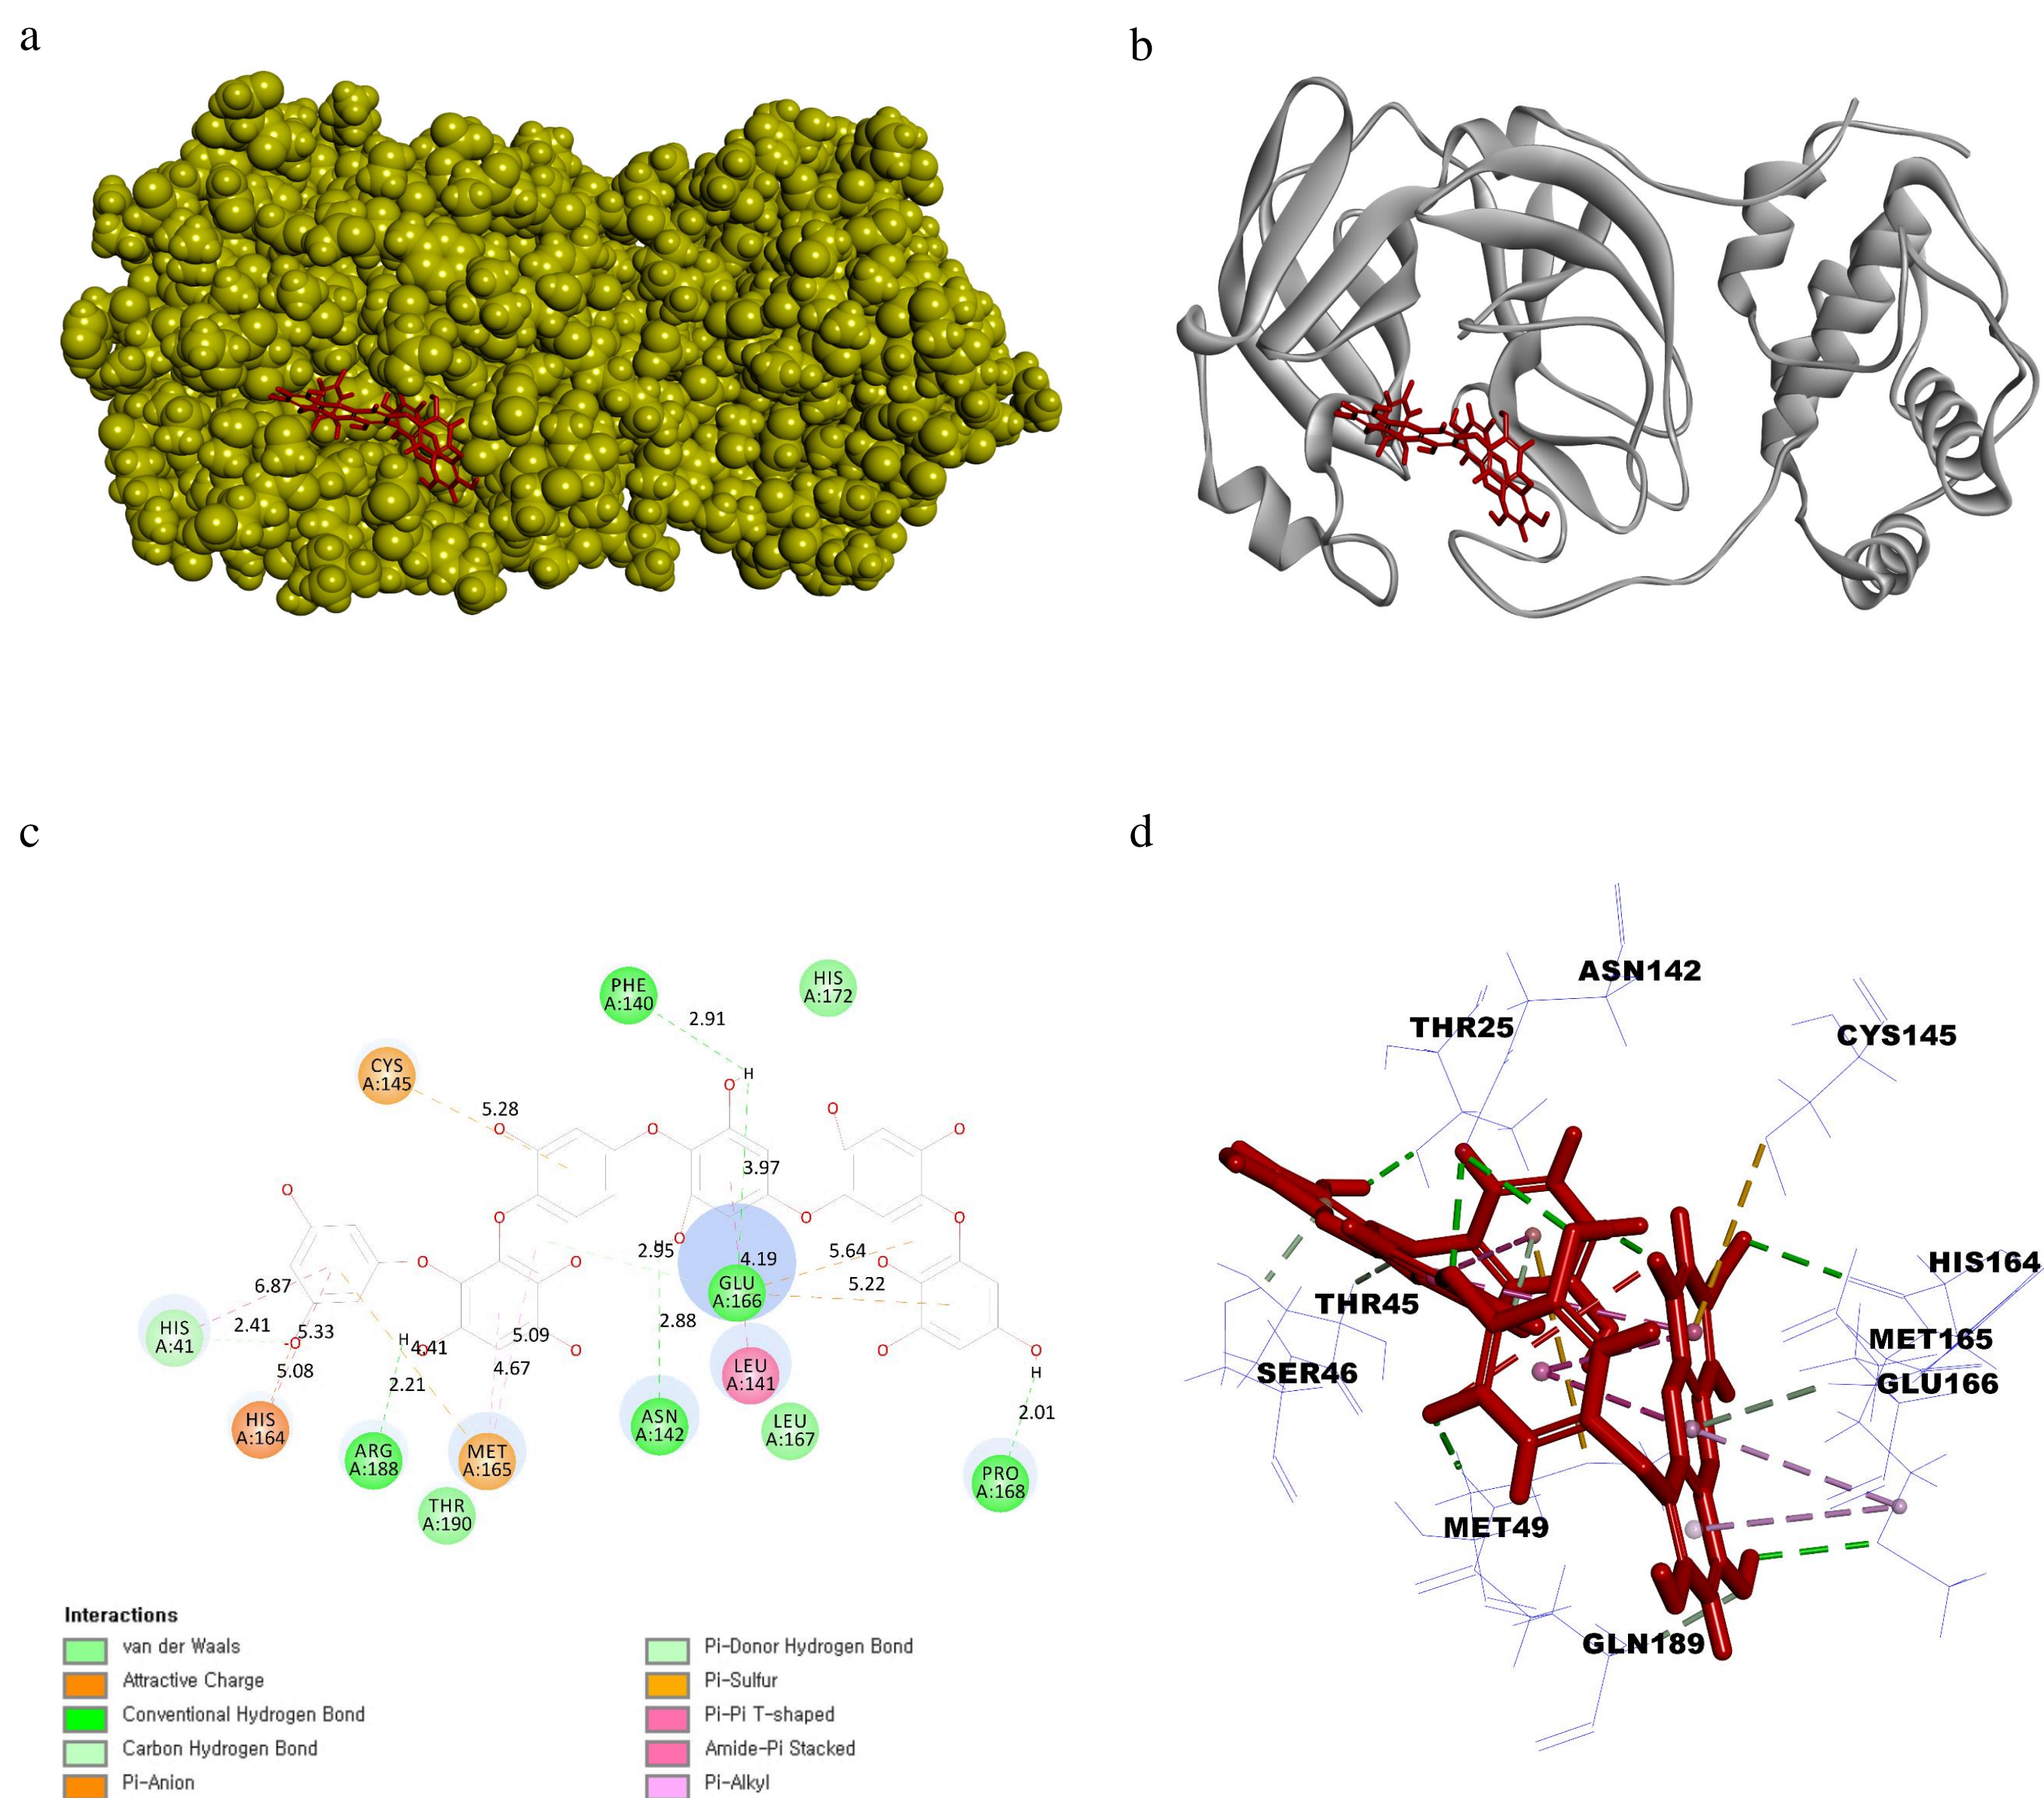

**Supplementary Figure S4. *In-silico* analysis of 3CL<sup>pro</sup> with Dieckol**, a) 3D representation of docking pose of Dieckol with 3CL<sup>pro</sup>. b) Cartoon representation of docking pose of Dieckol with 3CL<sup>pro</sup>. c) 2D representation of Ligand interaction of Dieckol with 3CL<sup>pro</sup>. d) 3D representation of Ligand interaction of Dieckol with 3CL<sup>pro</sup>



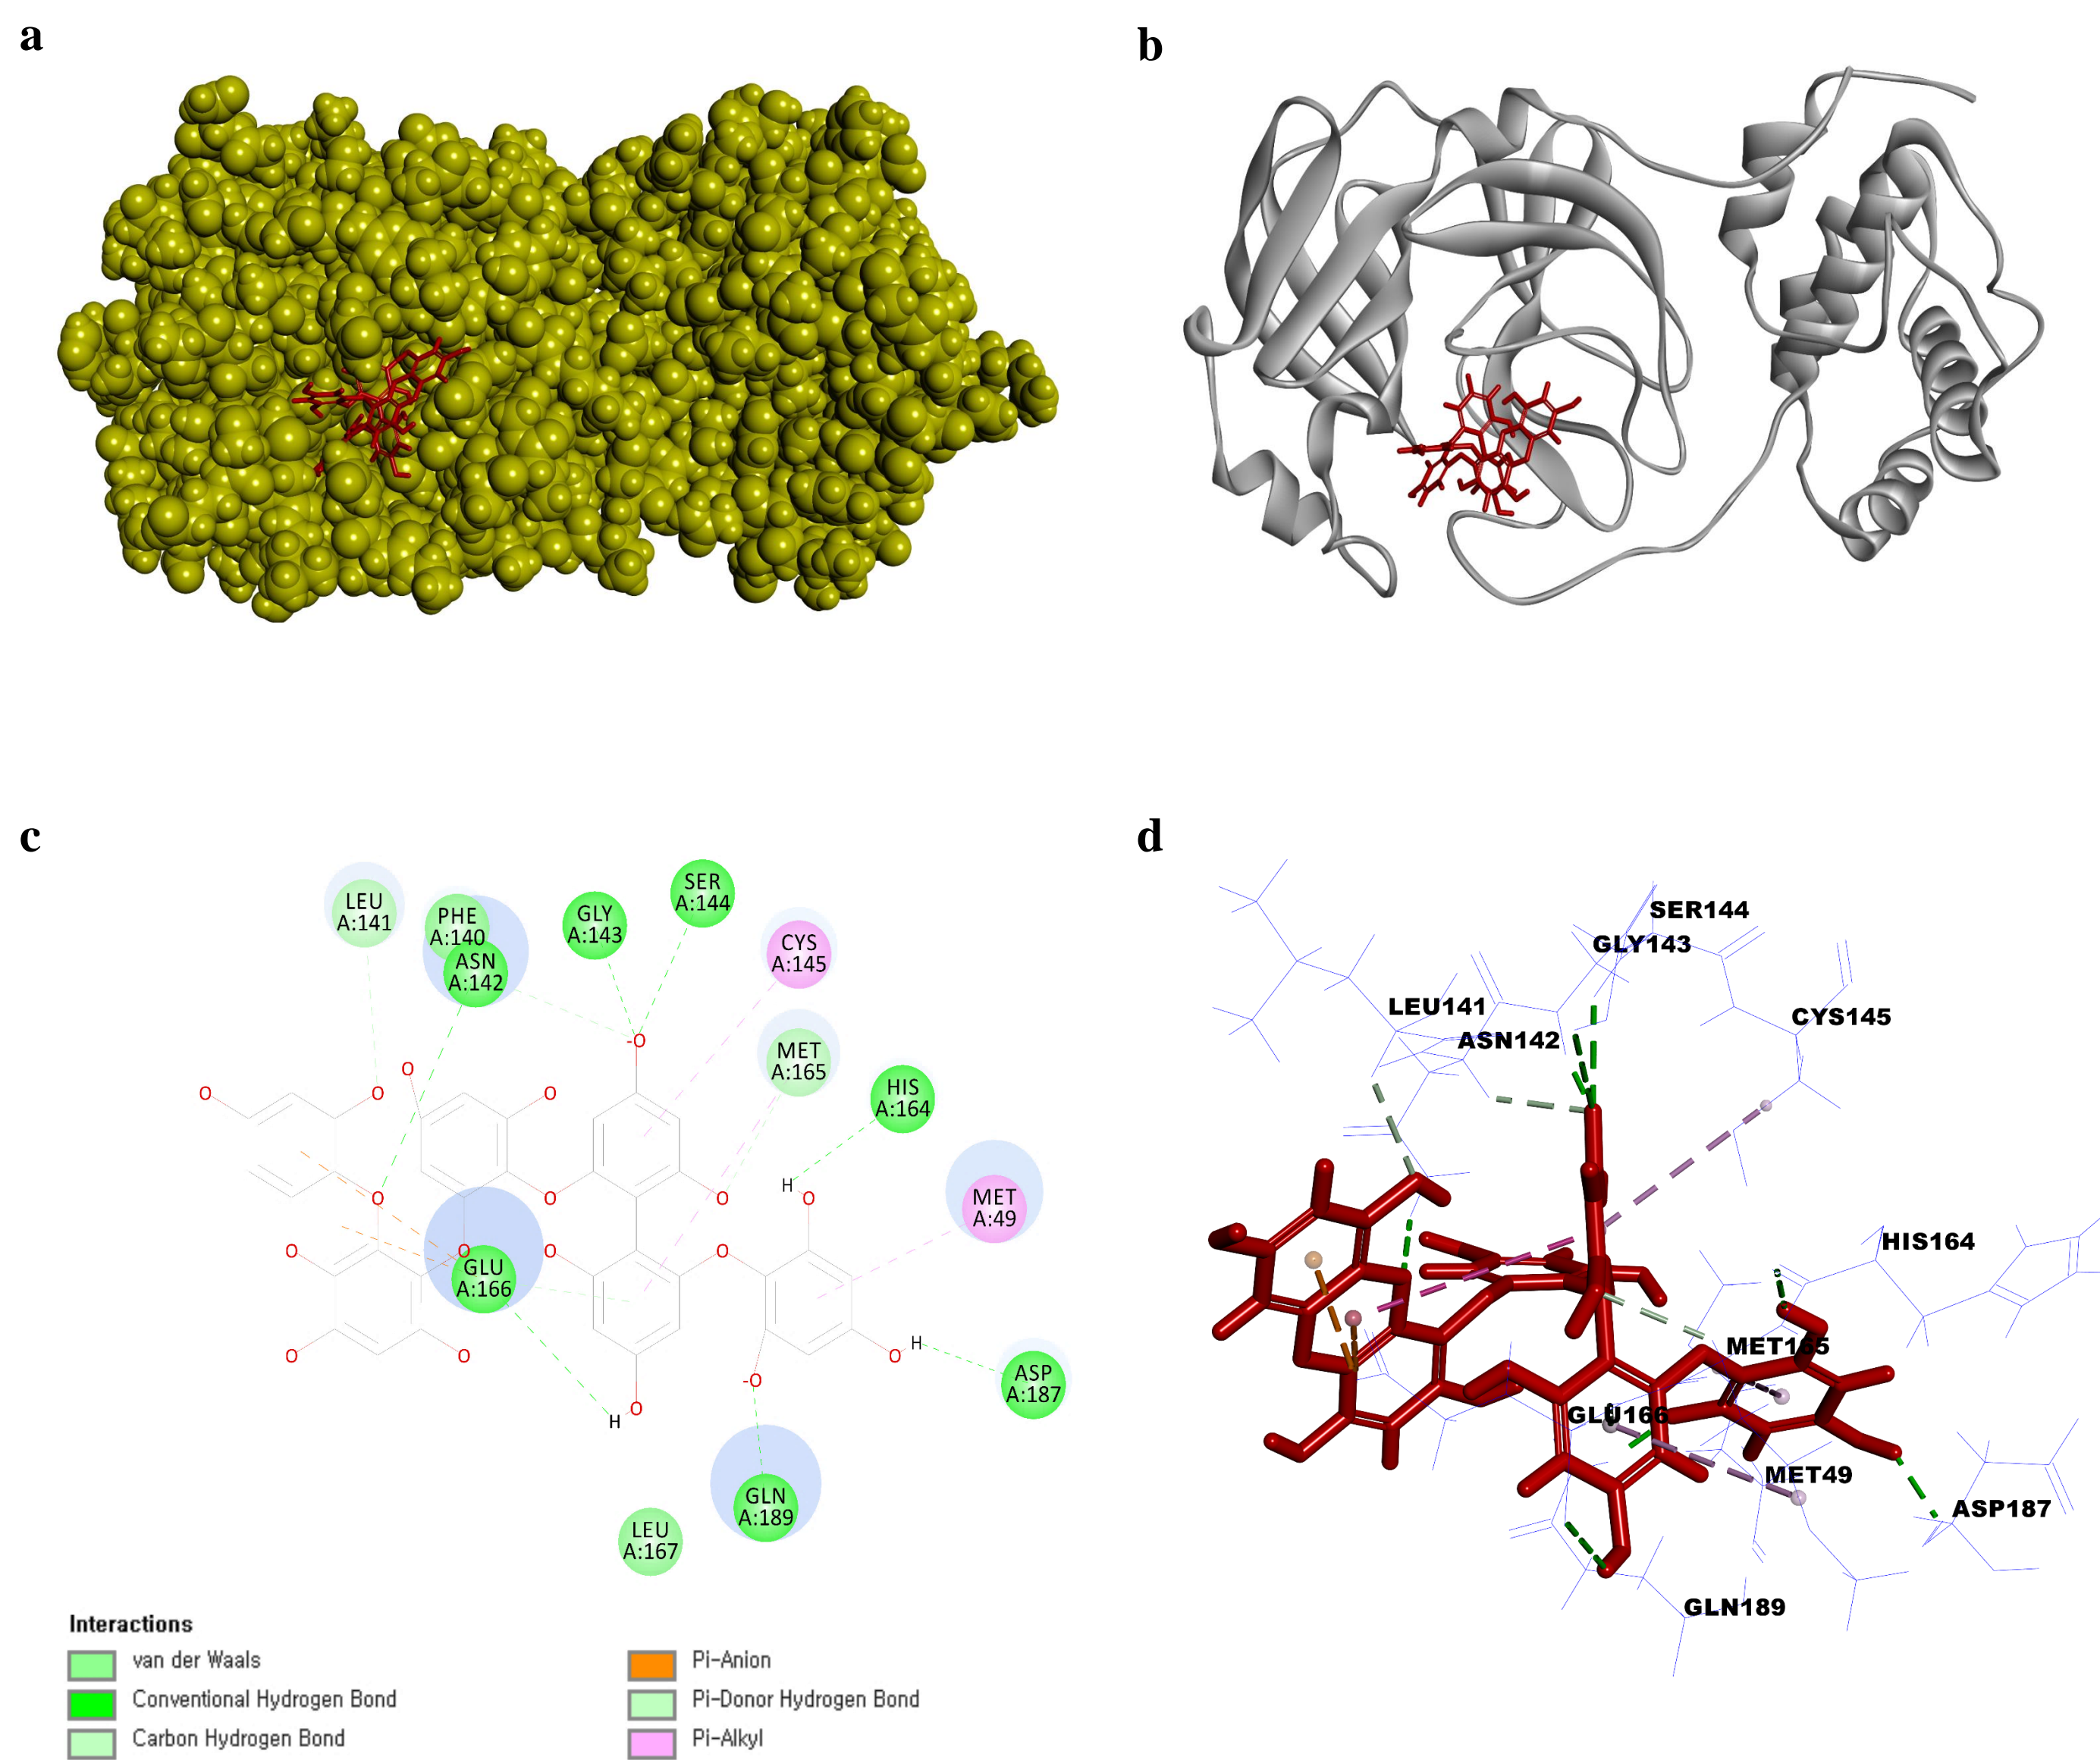

**Supplementary Figure S5. *In-silico* analysis of 3CL<sup>pro</sup> with Eckmaxol**, a) 3D representation of docking pose of Eckmaxol with 3CL<sup>pro</sup>. b) Cartoon representation of docking pose of Eckmaxol with 3CL<sup>pro</sup>. c) 2D representation of Ligand interaction of Eckmaxol with 3CL<sup>pro</sup>. d) 3D representation of Ligand interaction of Eckmaxol with 3CL<sup>pro</sup>



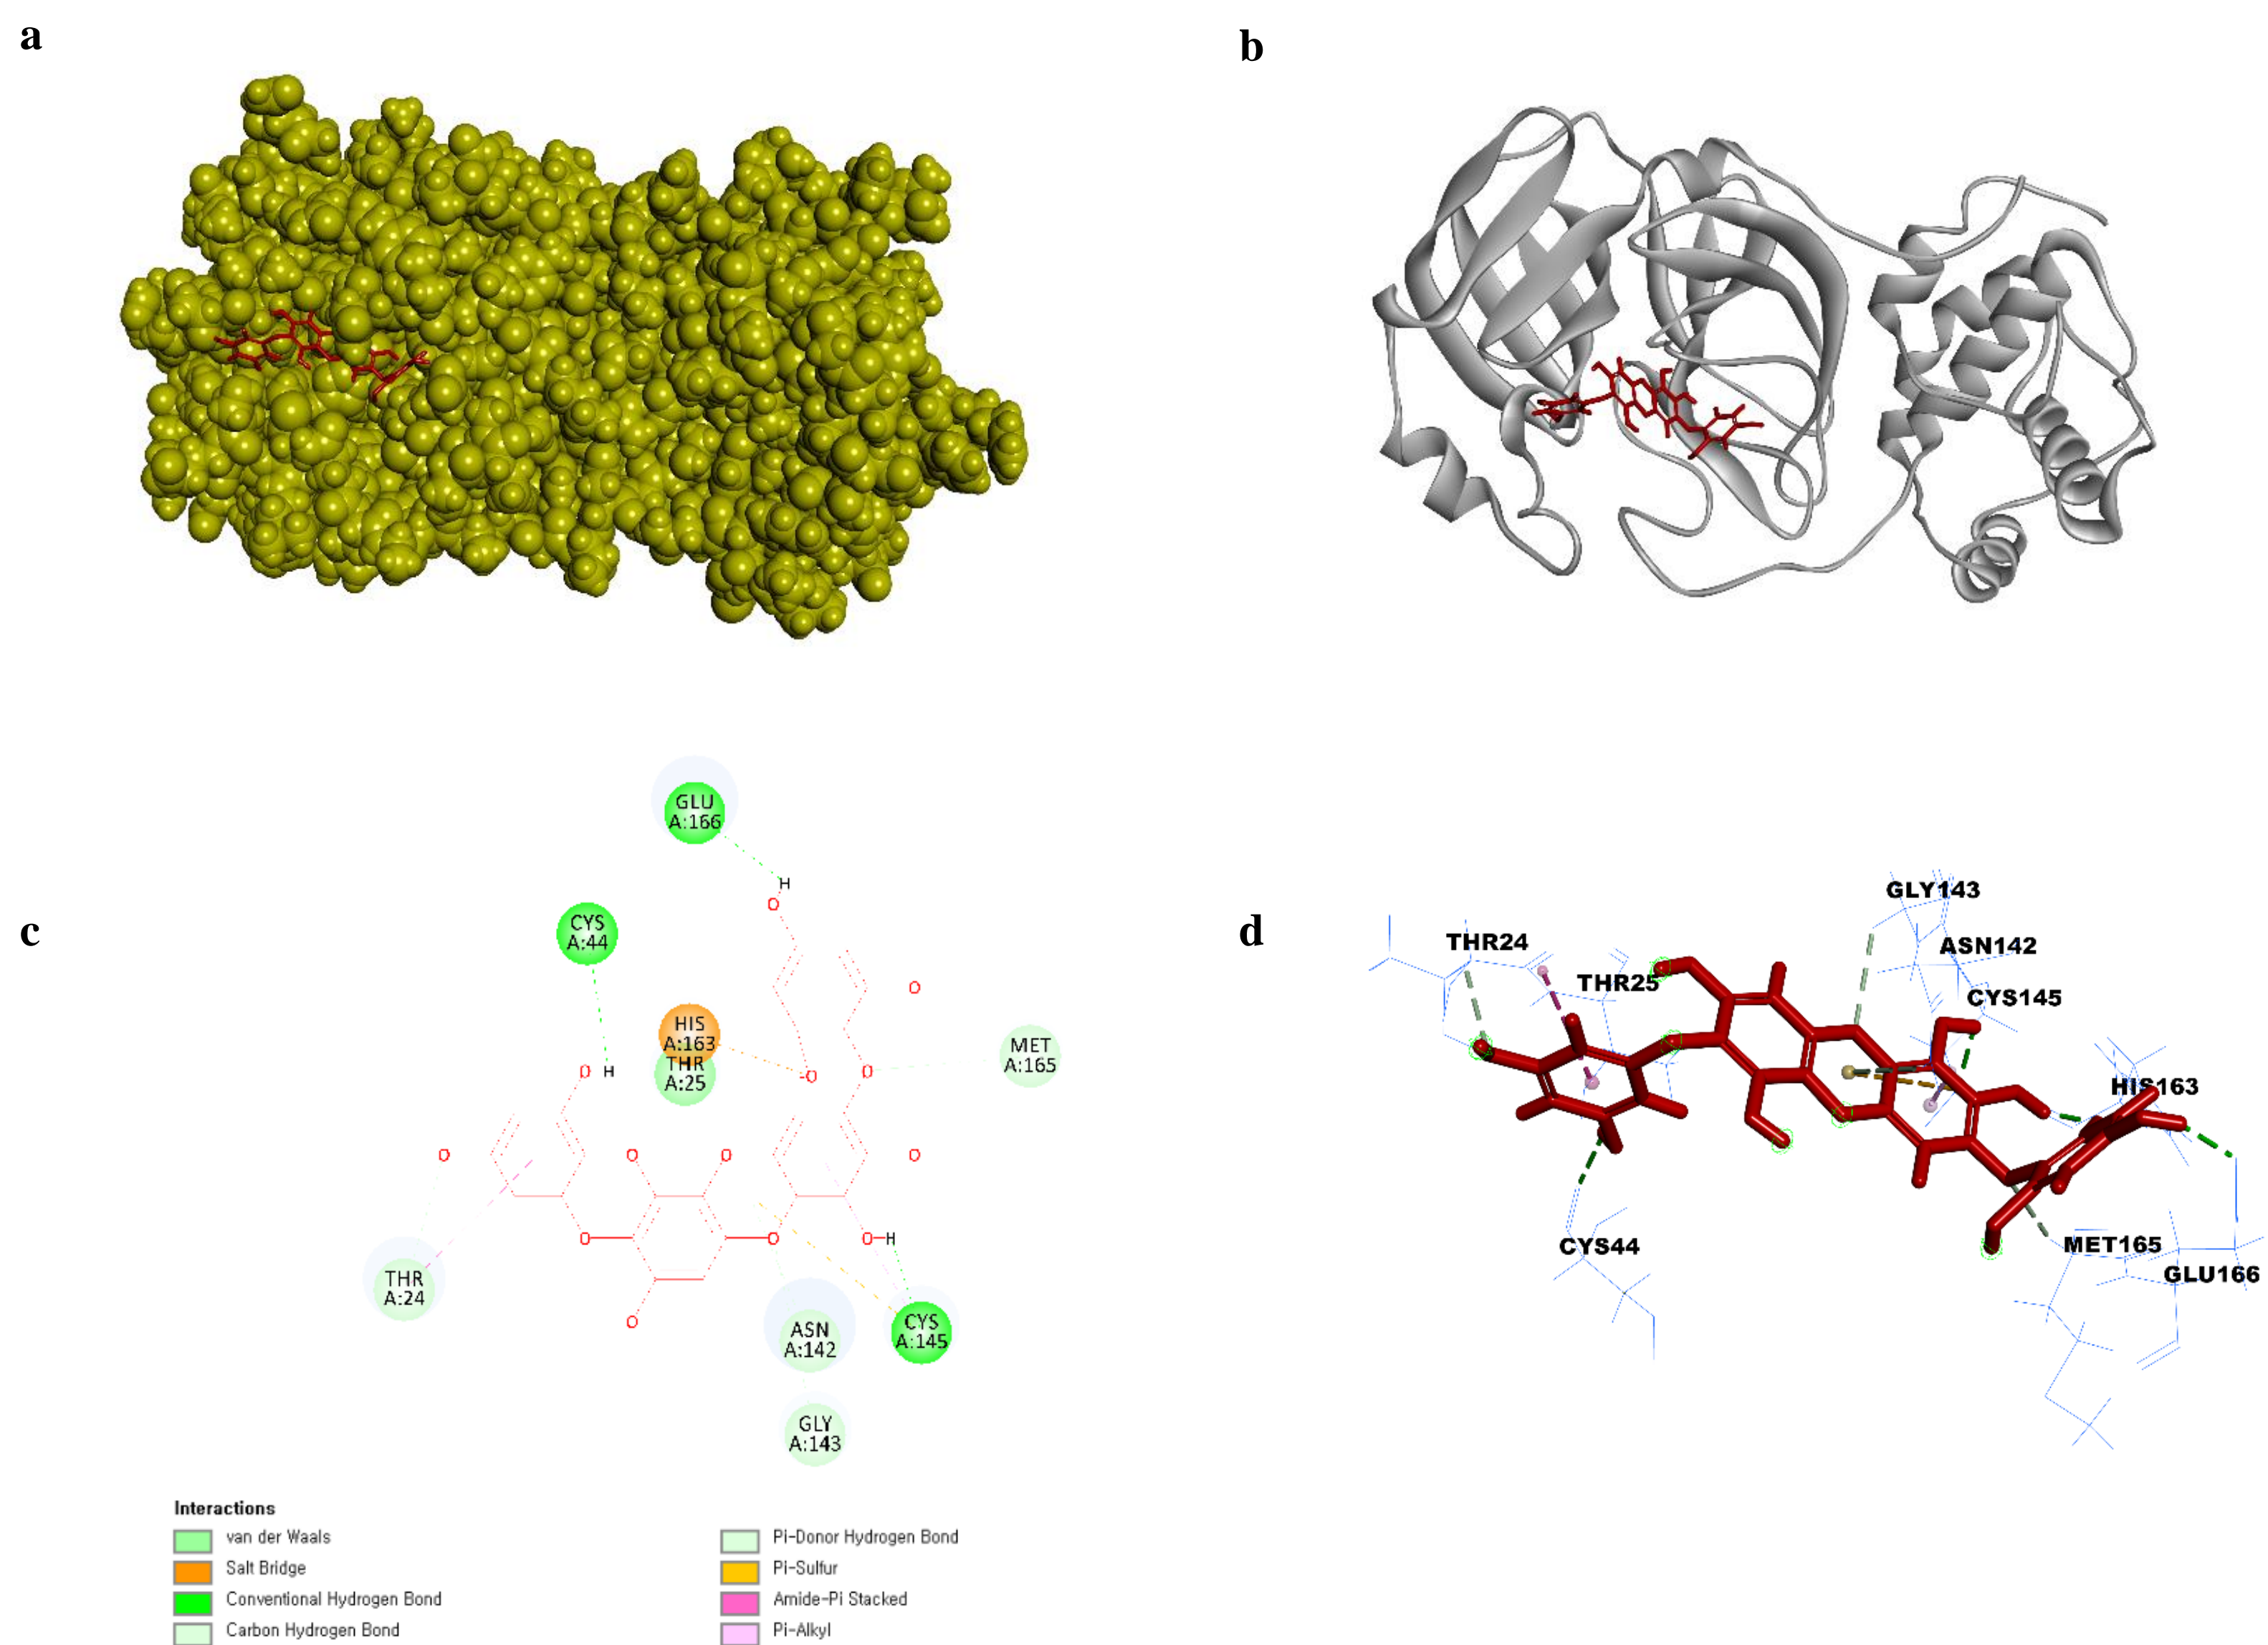

**Supplementary Figure S6. *In-silico* analysis of 3CL<sup>pro</sup> with Diphlorethohydroxycarmalol (DPHC),** a) 3D representation of docking pose of DPHC with 3CL<sup>pro</sup>. b) Cartoon representation of docking pose of DPHC with 3CL<sup>pro</sup>. c) 2D representation of Ligand interaction of DPHC with 3CL<sup>pro</sup>. d) 3D representation of Ligand interaction of DPHC with 3CL<sup>pro</sup>



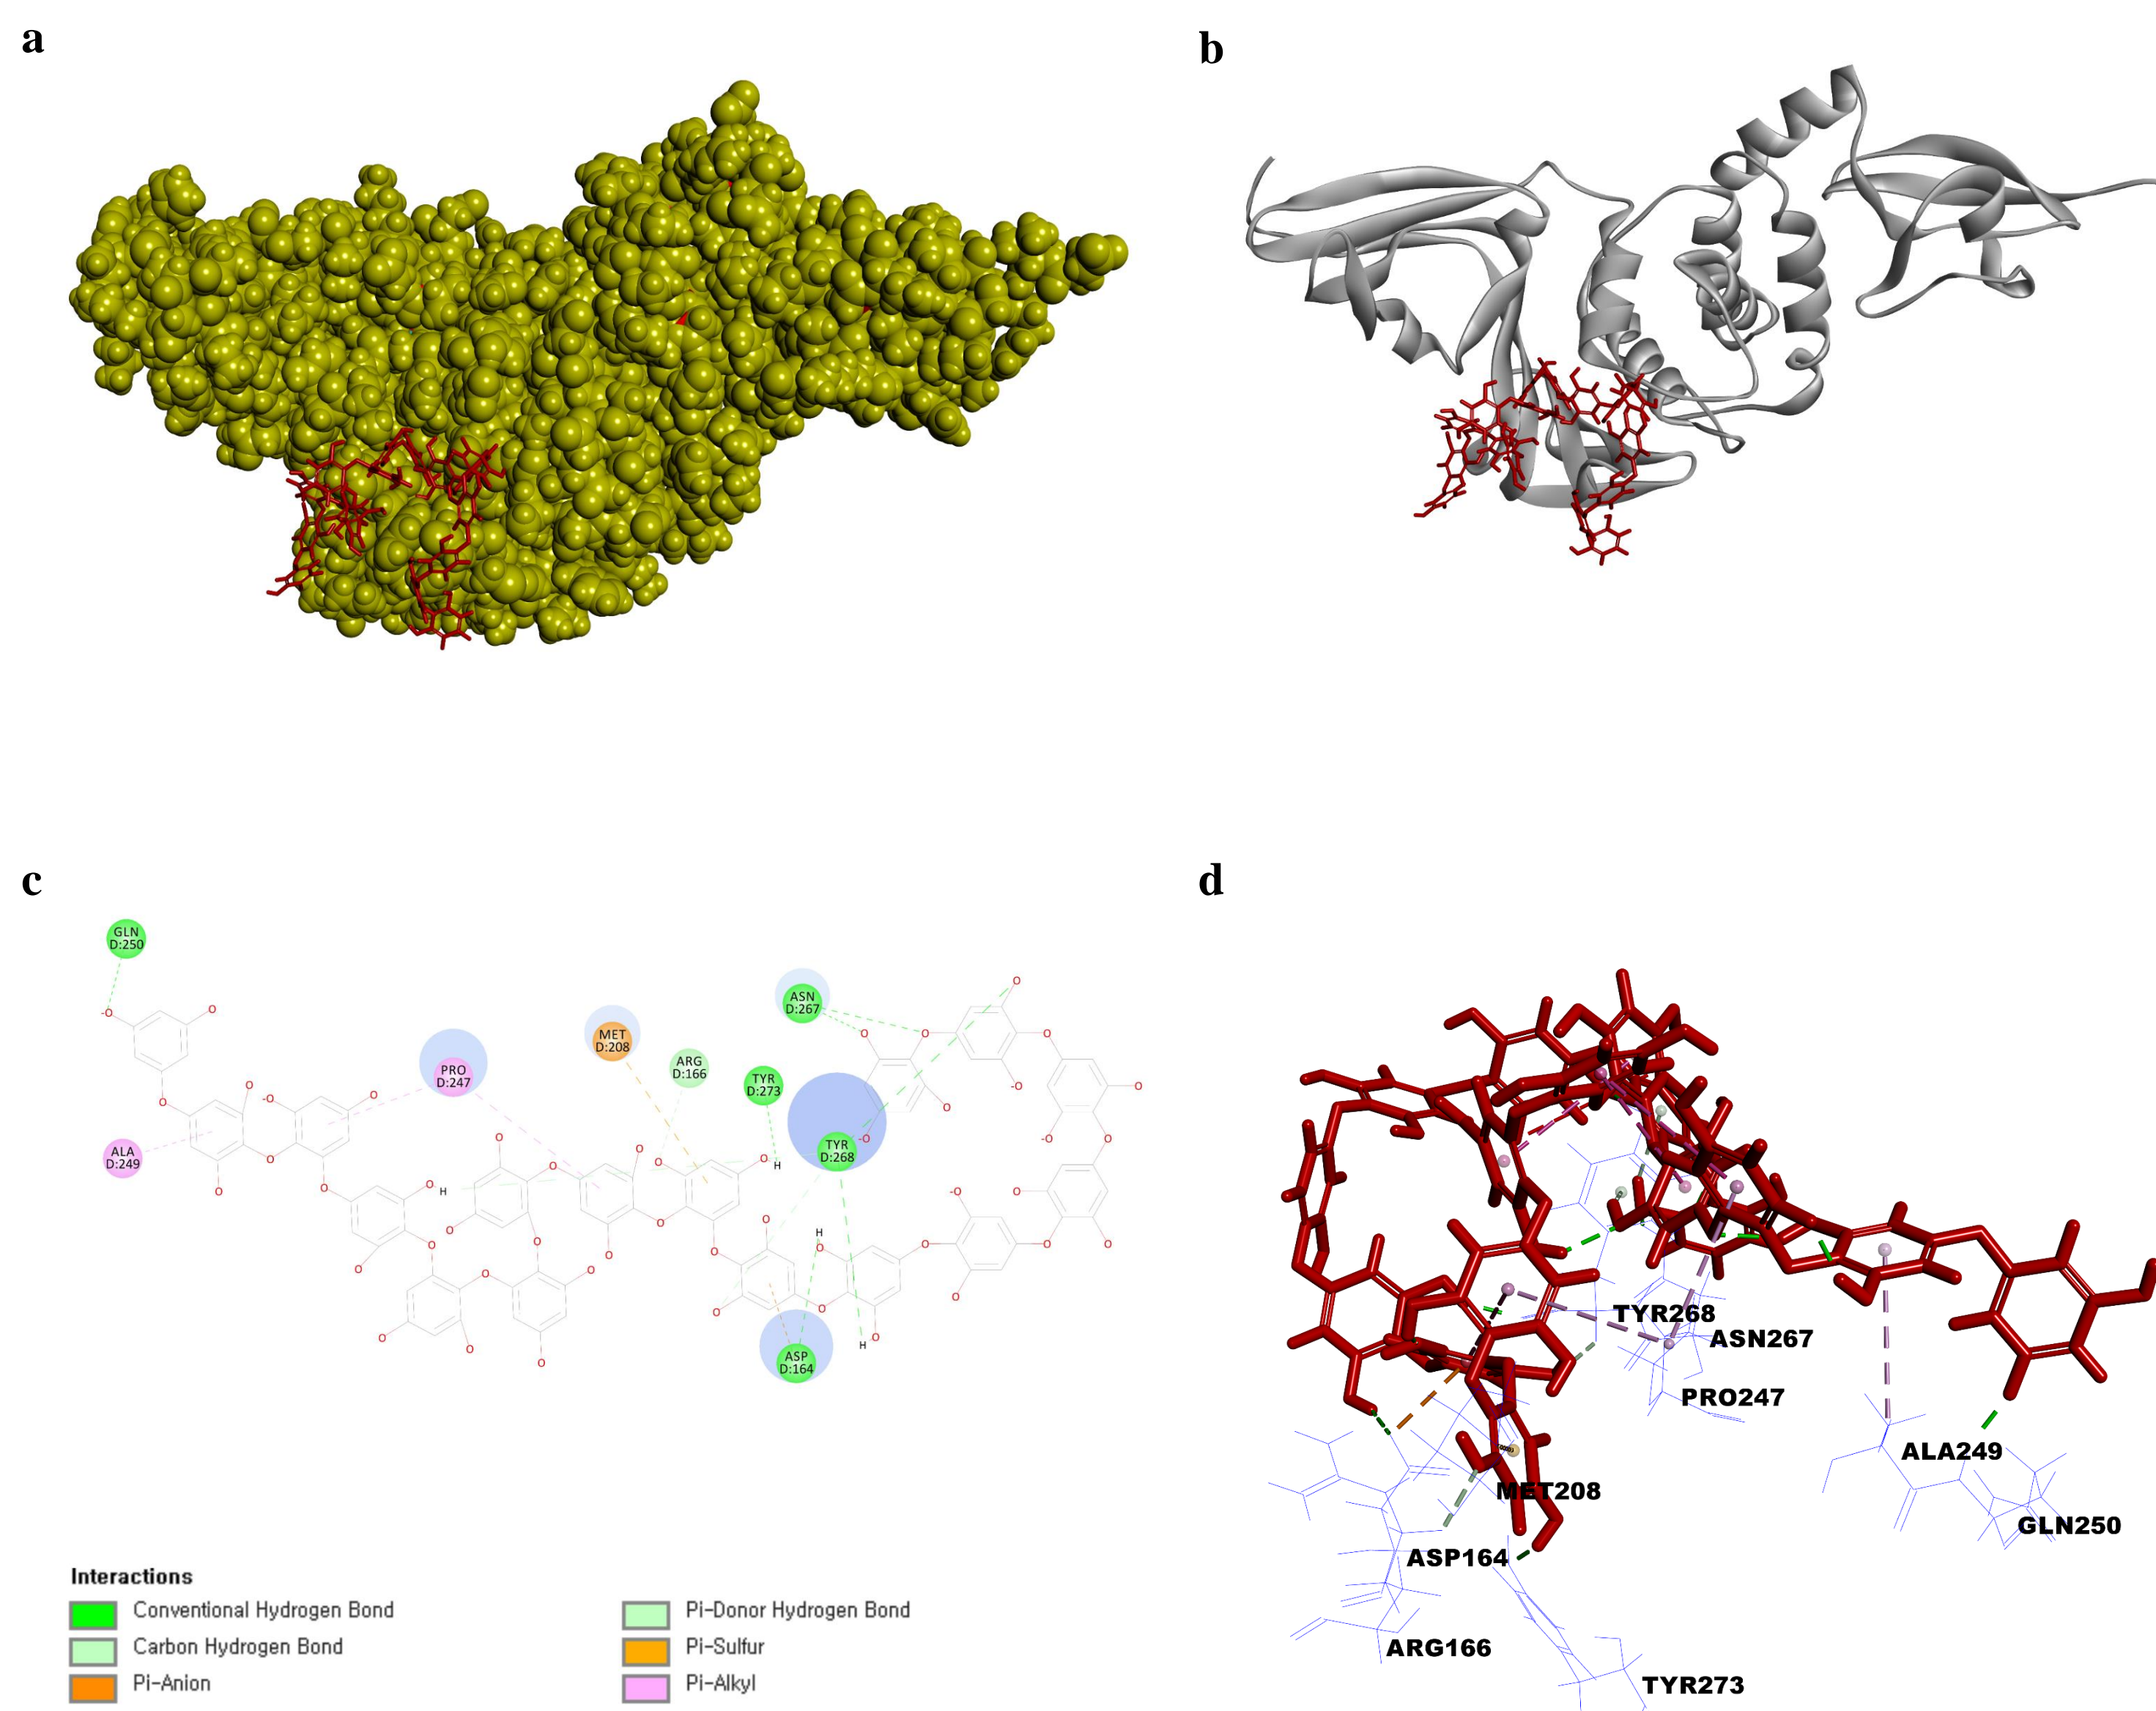

**Supplementary Figure S7. *In-silico* analysis of PL<sup>pro</sup> with Ishophloroglucinol A (IPA),** a) 3D representation of docking pose of IPA with PL<sup>pro</sup>. b) Cartoon representation of docking pose of IPA with PL<sup>pro</sup>. c) 2D representation of Ligand interaction of IPA with PL<sup>pro</sup>. d) 3D representation of Ligand interaction of IPA with PL<sup>pro</sup>



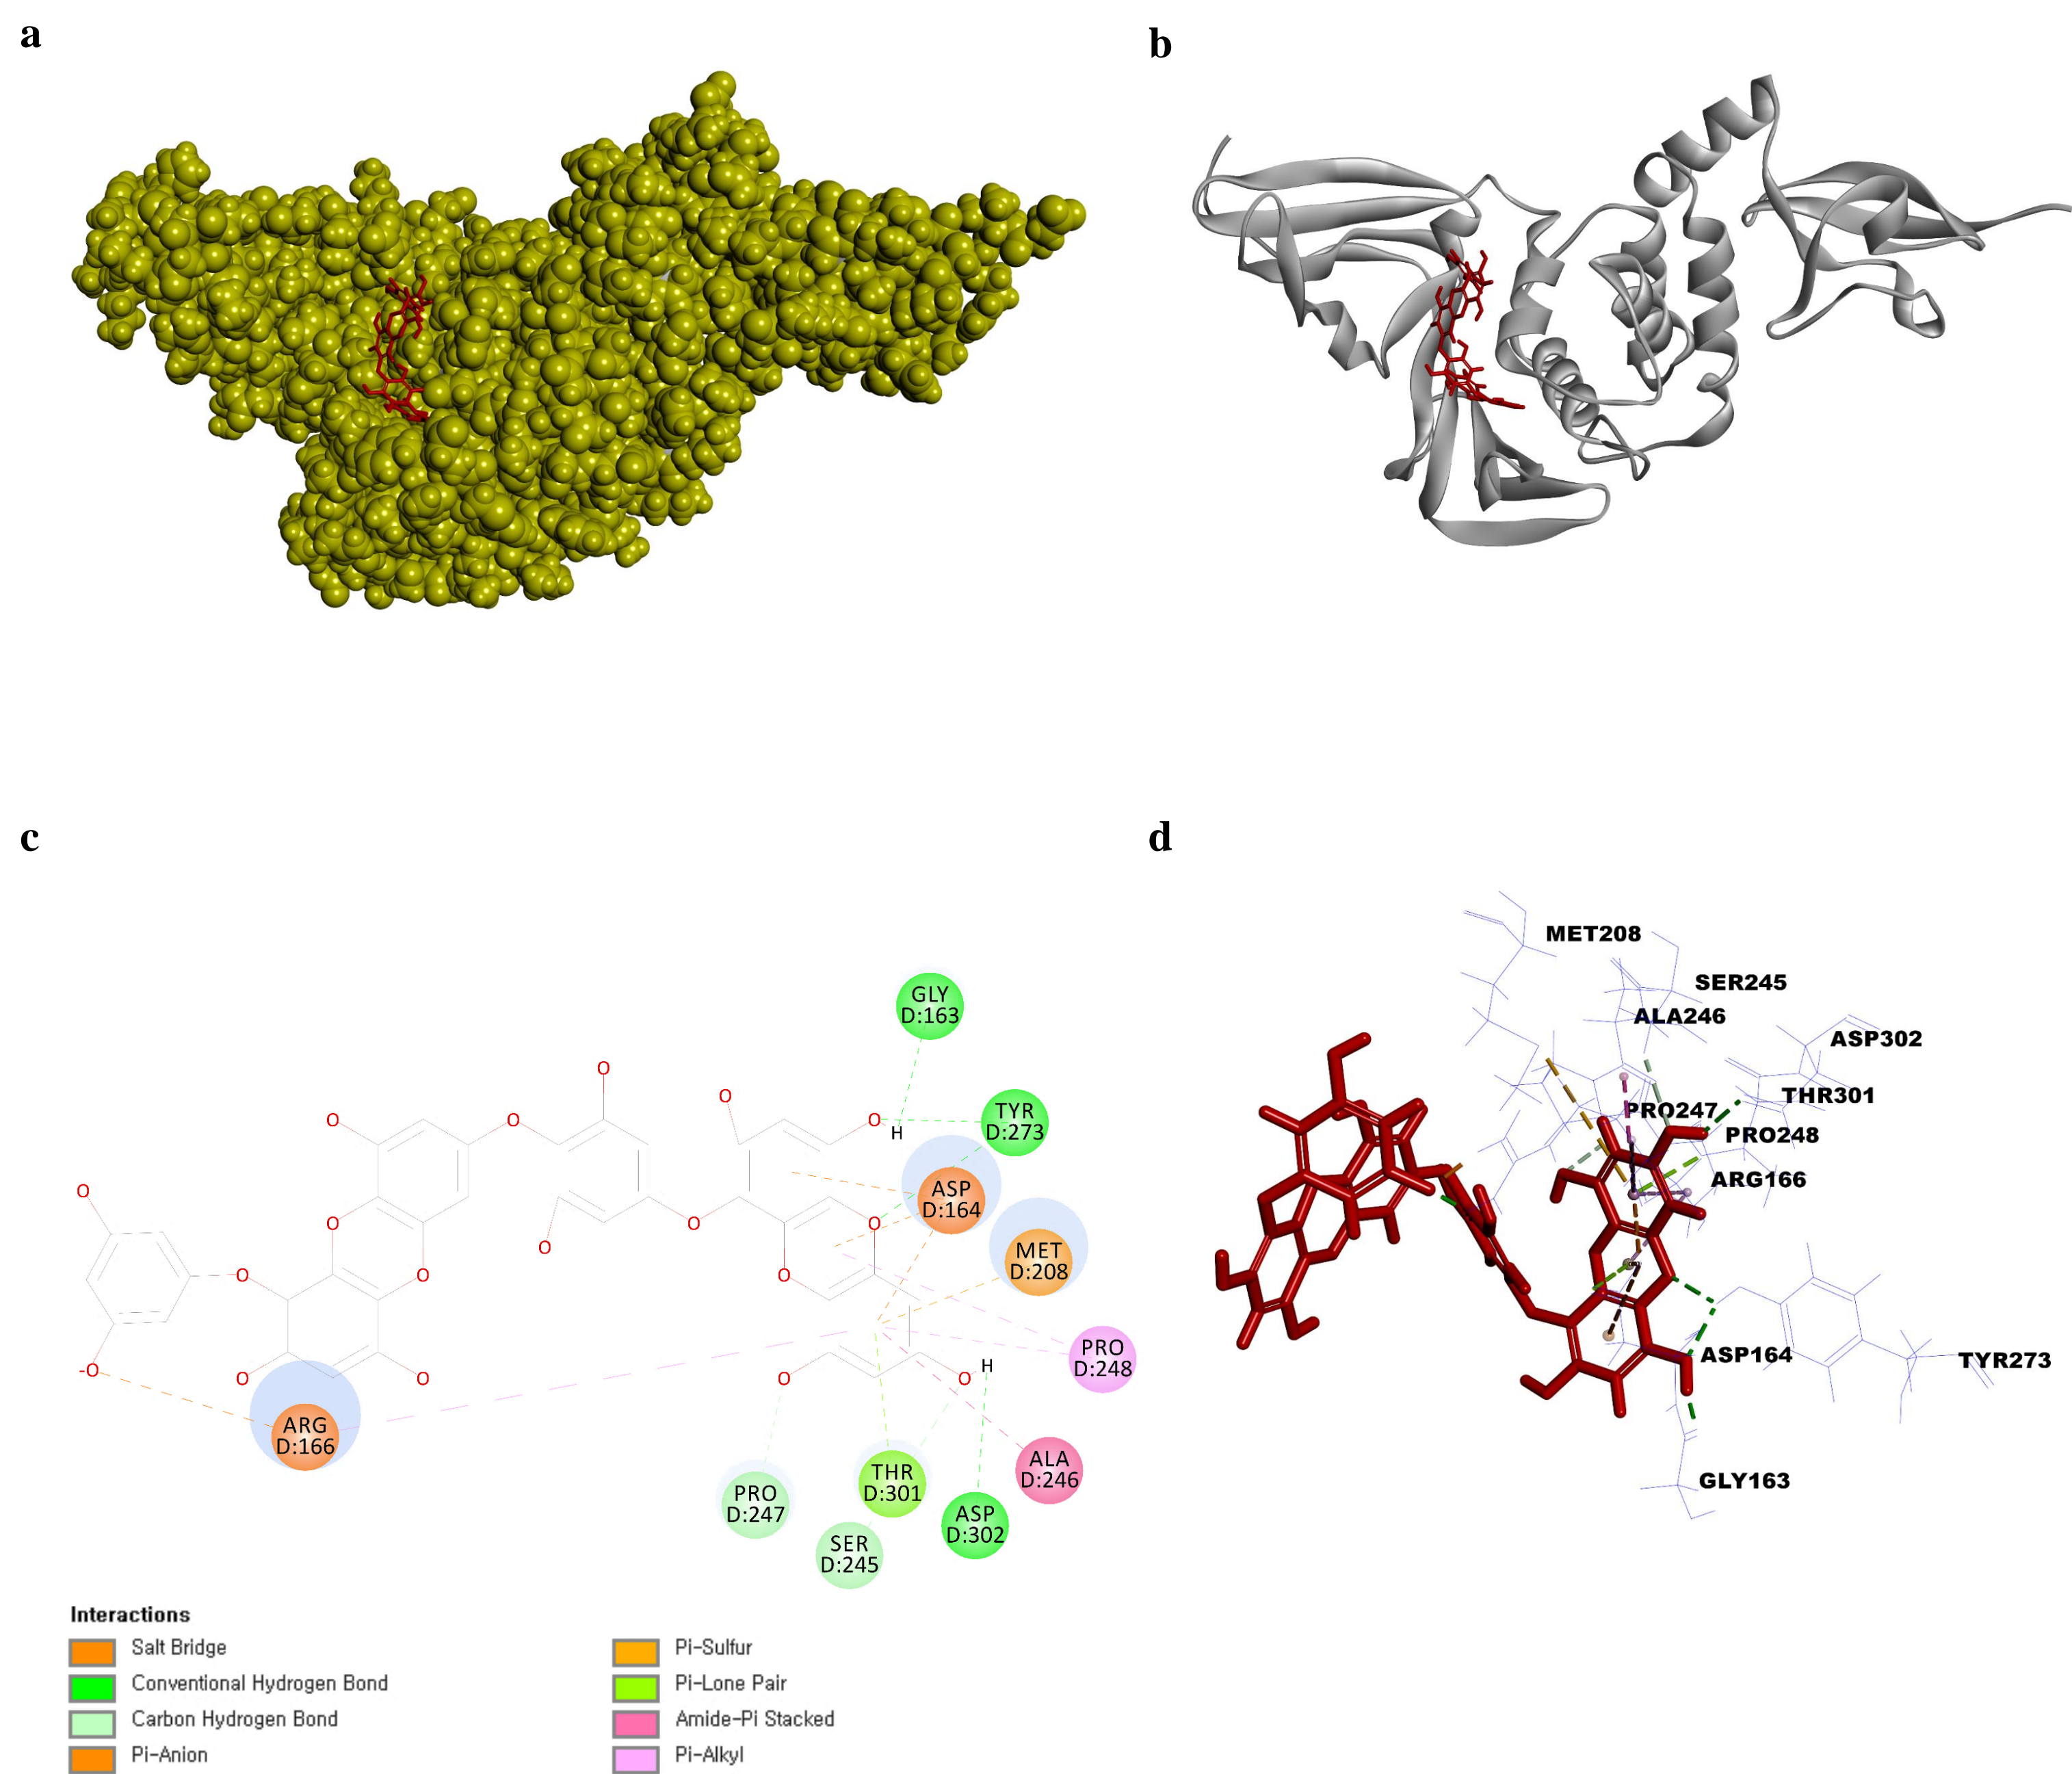

**Supplementary Figure S8. *In-silico* analysis of PL<sup>pro</sup> with Dieckol**, a) 3D representation of docking pose of Dieckol with PL<sup>pro</sup>. b) Cartoon representation of docking pose of Dieckol with PL<sup>pro</sup>. c) 2D representation of Ligand interaction of Dieckol with PL<sup>pro</sup>. d) 3D representation of Ligand interaction of Dieckol with PL<sup>pro</sup>



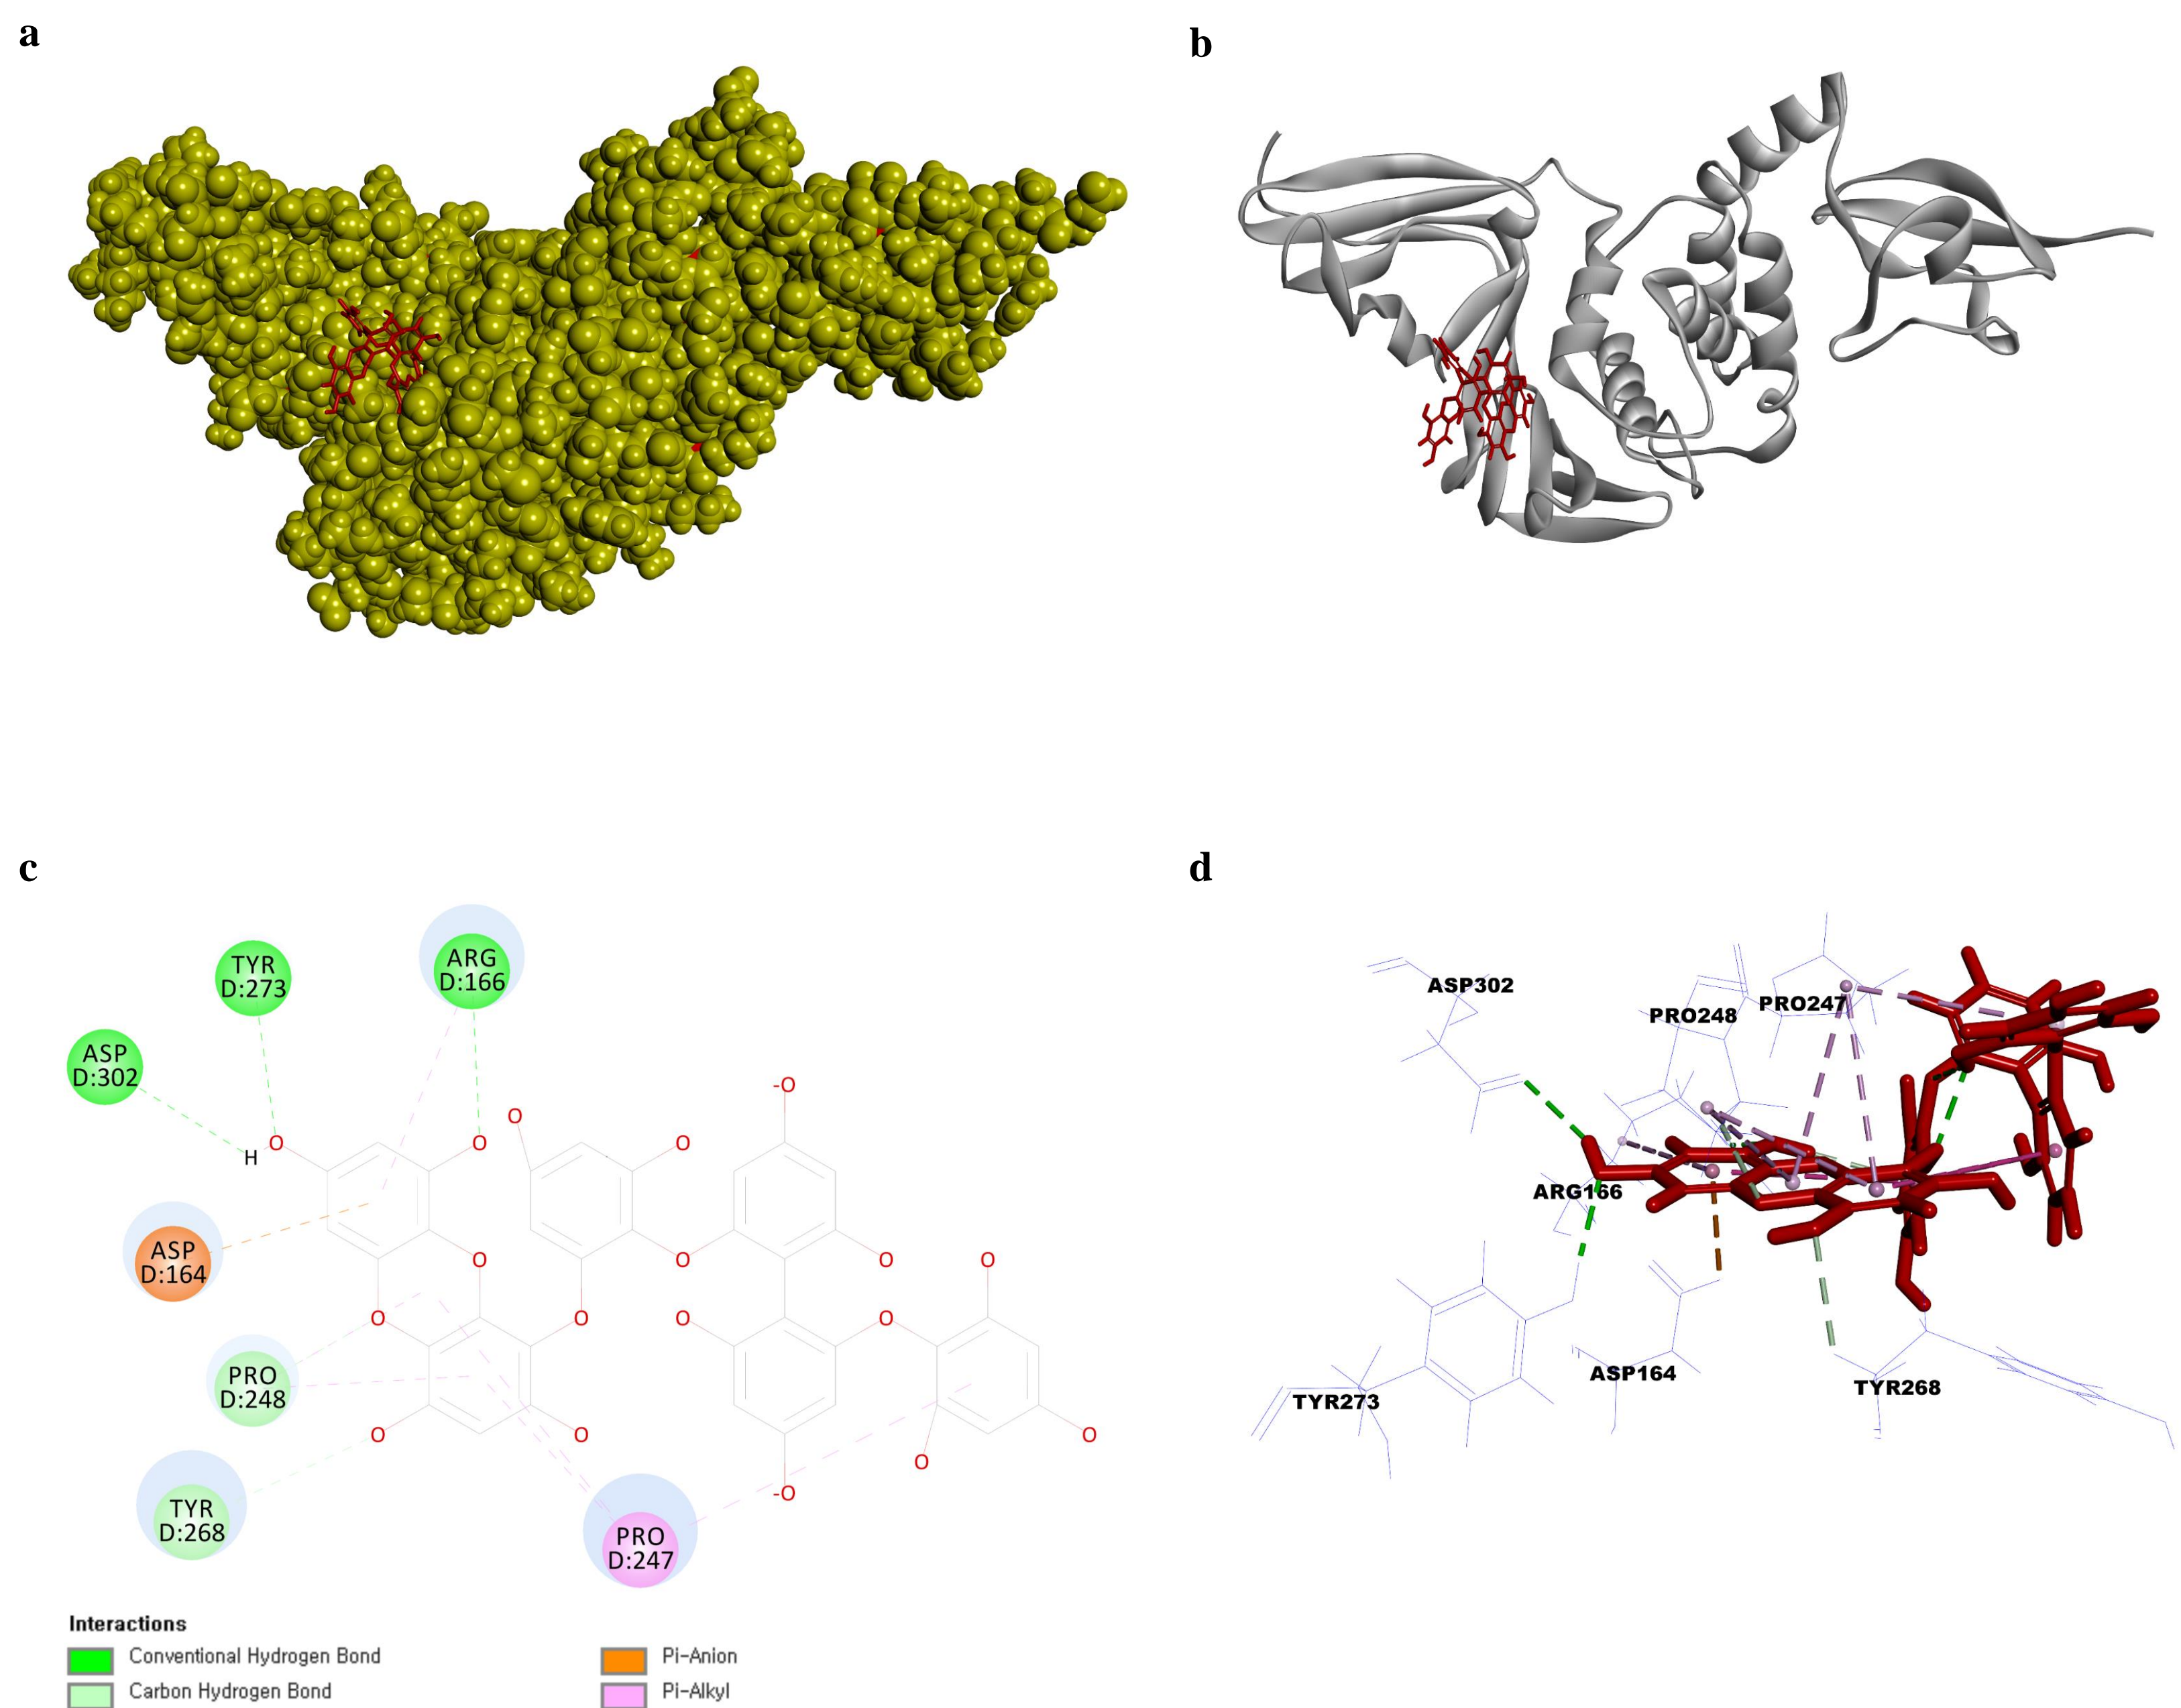

**Supplementary Figure S9. *In-silico* analysis of PL<sup>pro</sup> with Eckmaxol,** a) 3D representation of docking pose of Eckmaxol with PL<sup>pro</sup>. b) Cartoon representation of docking pose of Eckmaxol with PL<sup>pro</sup>. c) 2D representation of Ligand interaction of Eckmaxol with PL<sup>pro</sup>. d) 3D representation of Ligand interaction of Eckmaxol with PL<sup>pro</sup>



**a**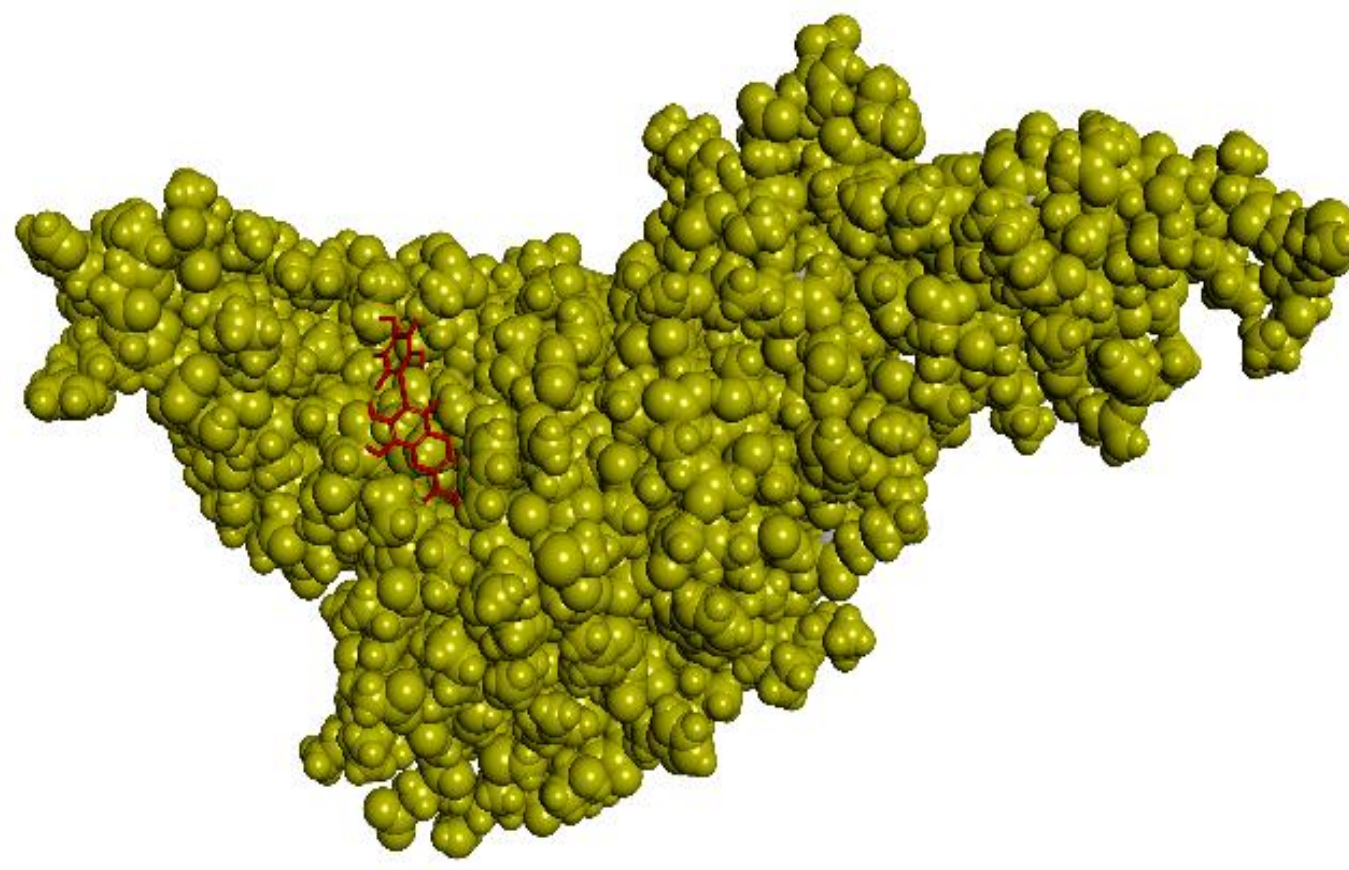**b**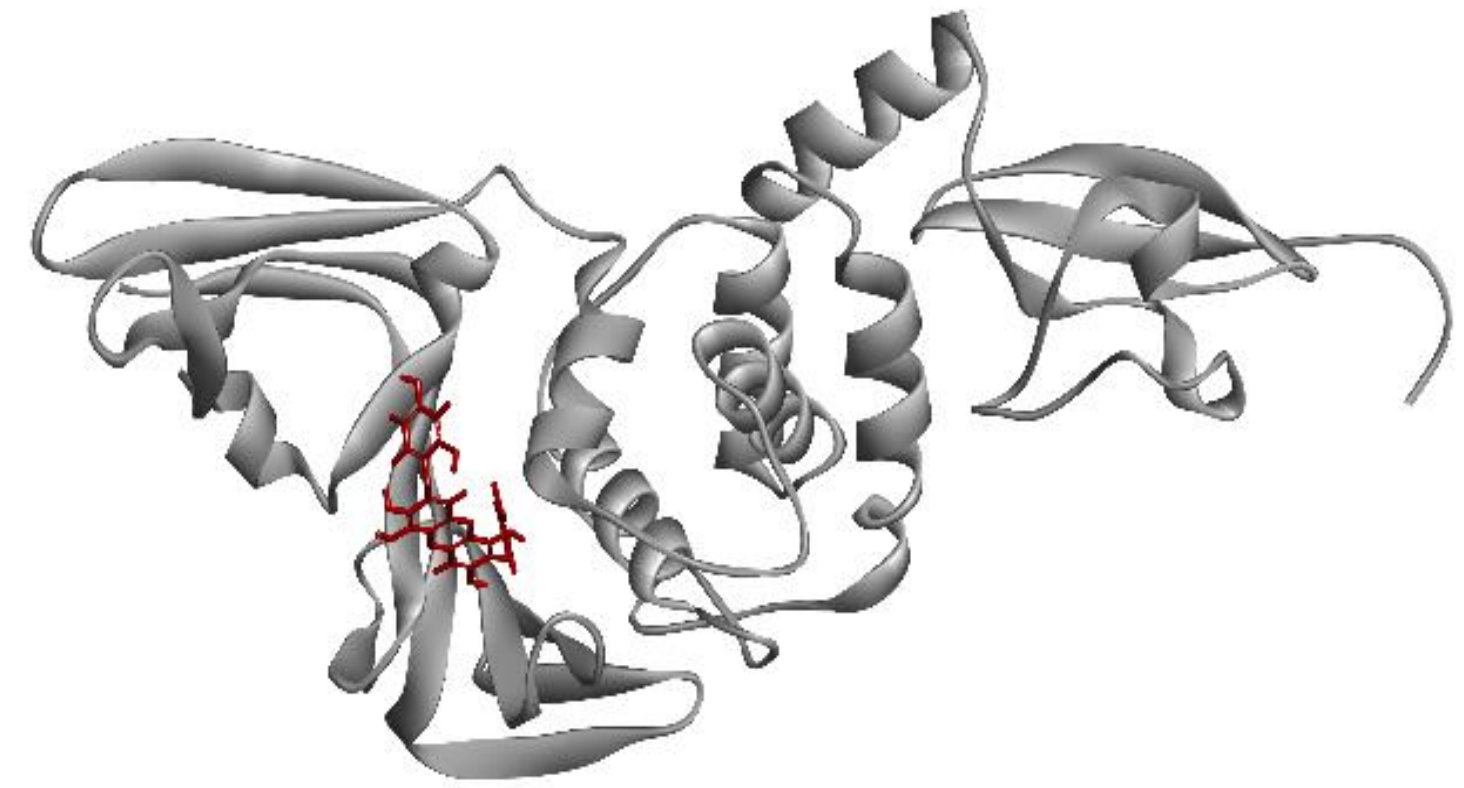**c**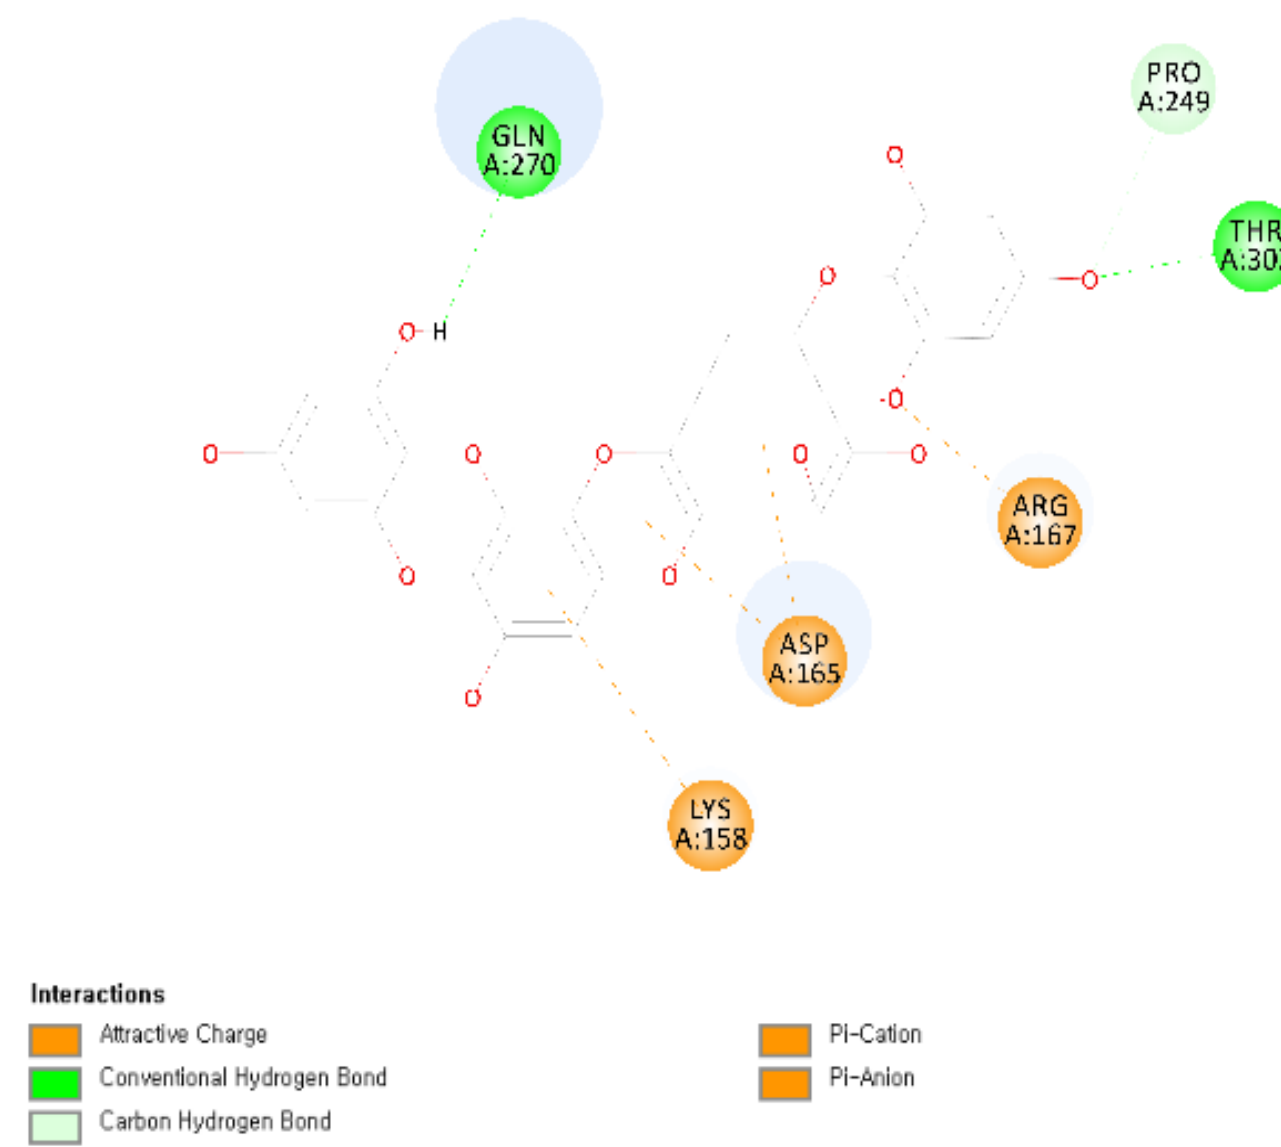**d**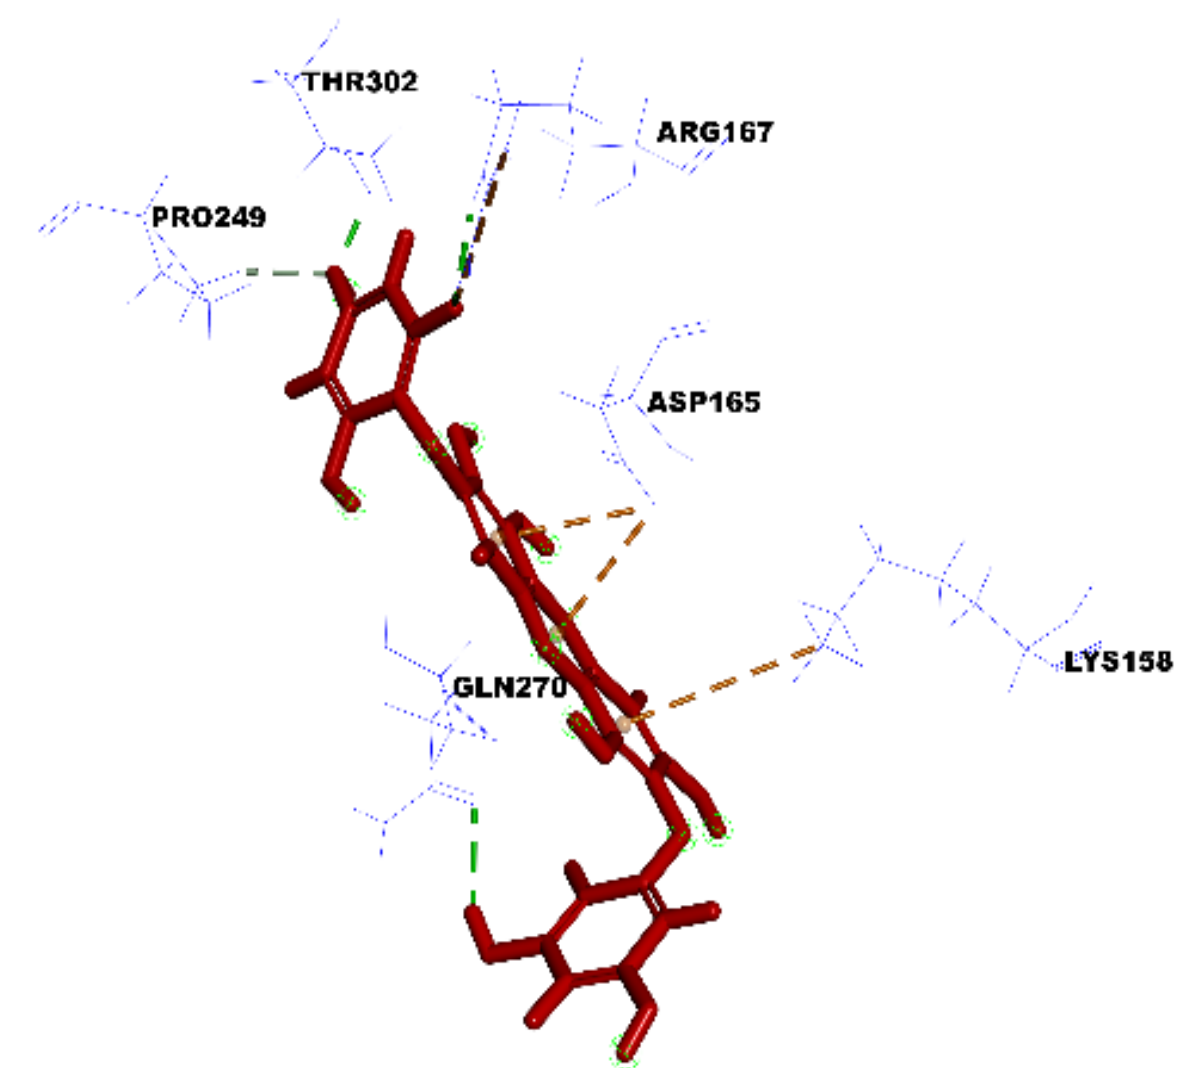

**Supplementary Figure S10. *In-silico* analysis of PL<sup>pro</sup> with Diploretrohydroxycarmalol (DPHC),** a) 3D representation of docking pose of DPHC with PL<sup>pro</sup>. b) Cartoon representation of docking pose of DPHC with PL<sup>pro</sup>. c) 2D representation of Ligand interaction of DPHC with PL<sup>pro</sup>. d) 3D representation of Ligand interaction of DPHC with PL<sup>pro</sup>



10% Extract in 70% EtOH

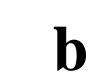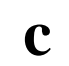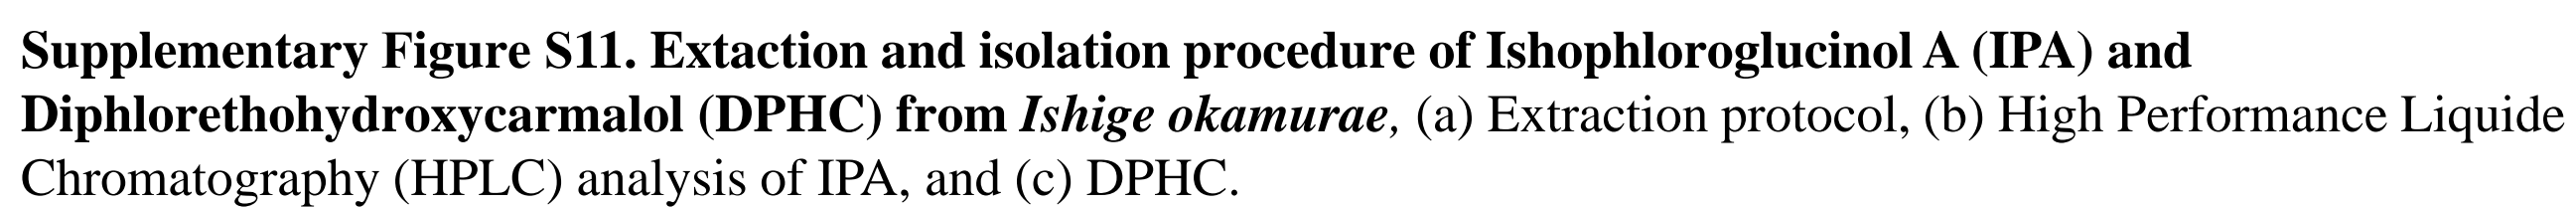



**a**

10% Extract in 70% EtOH

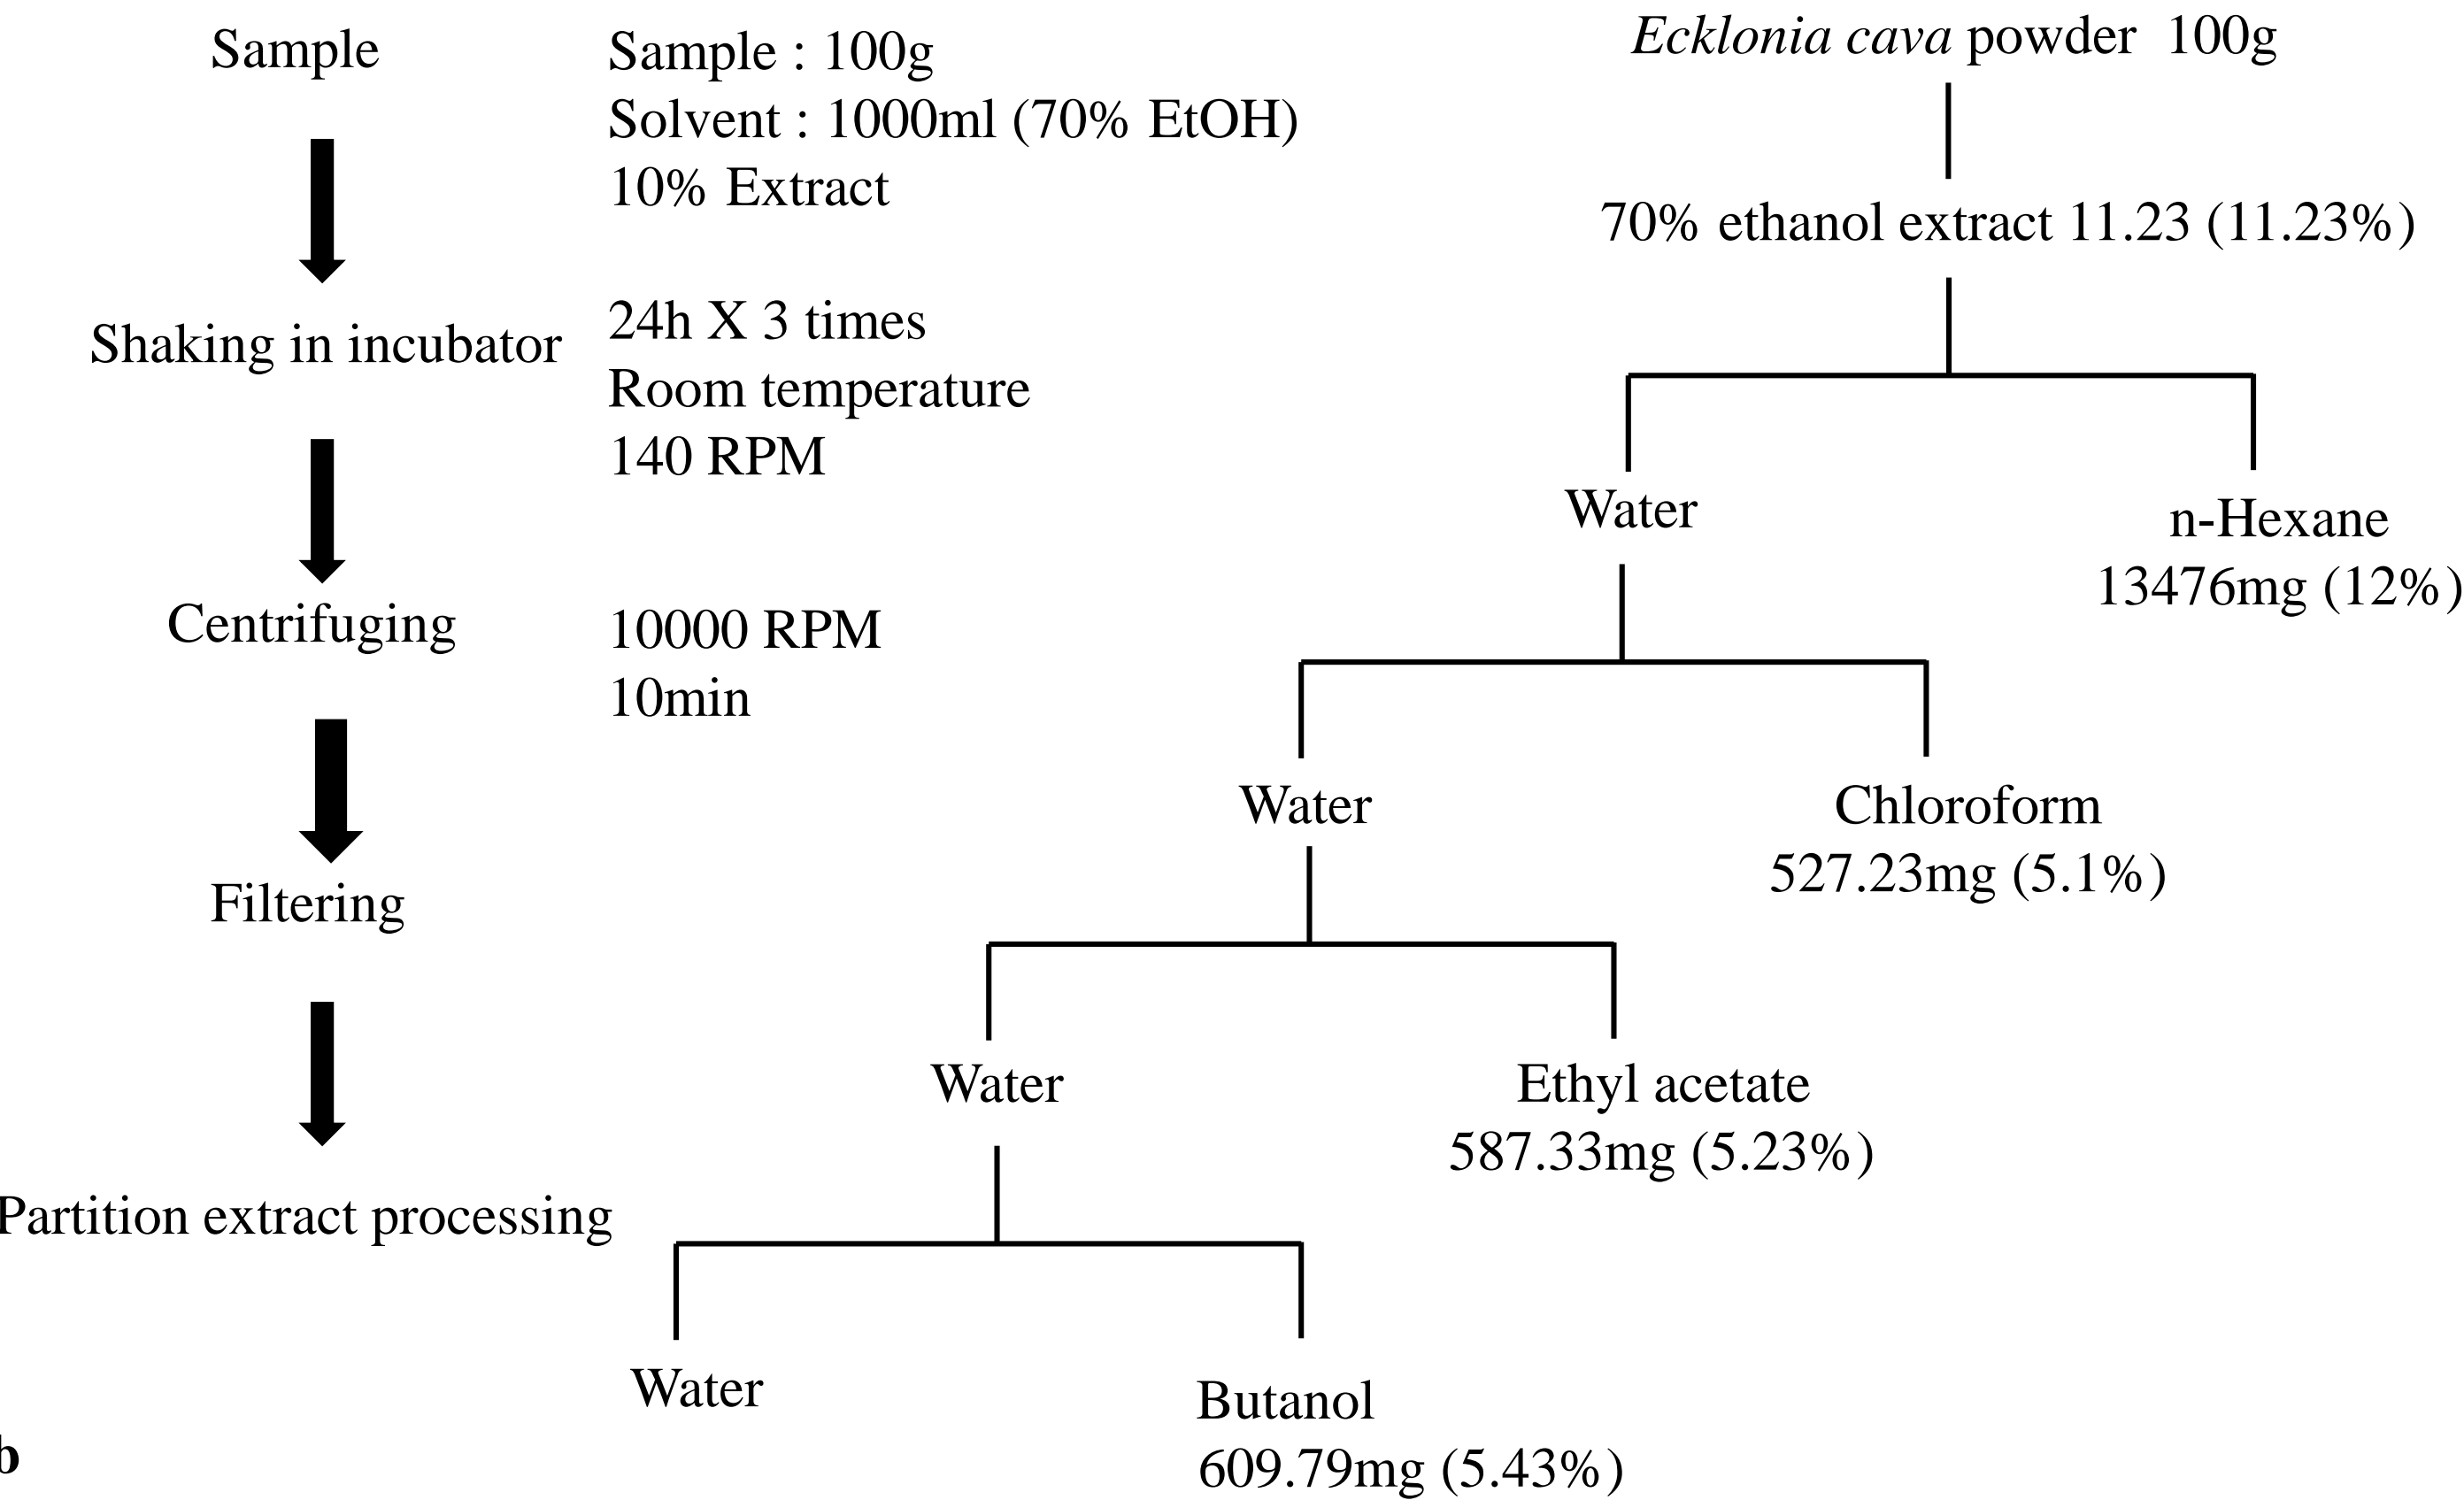

**b**

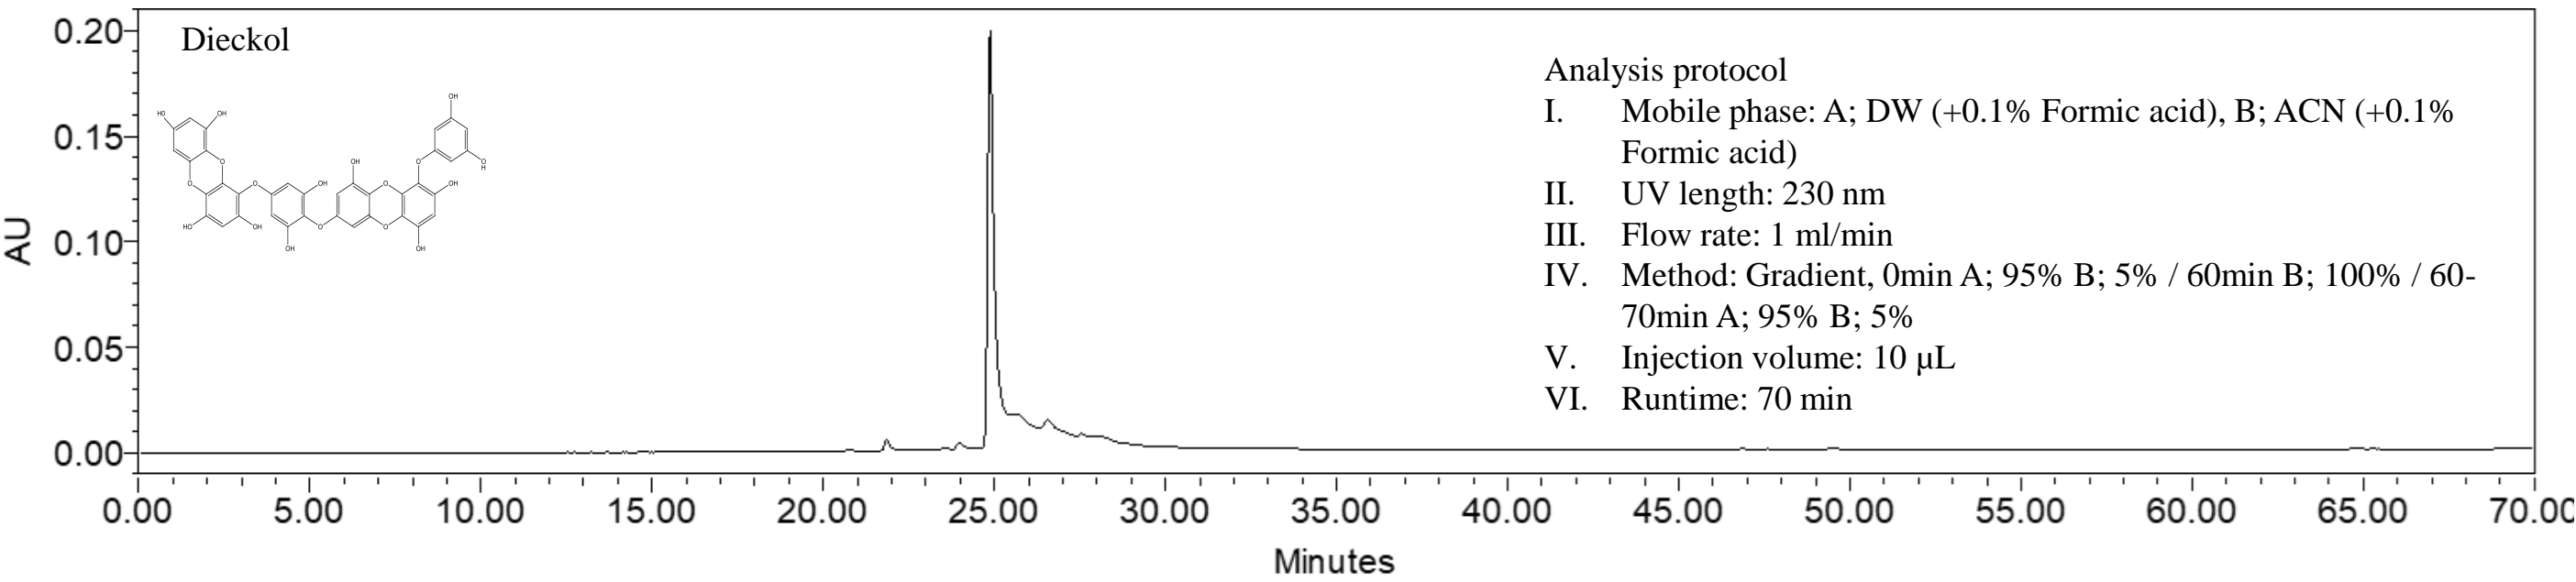

**Supplementary Figure S12.. Extaction and isolation procedure of Dieckol from *Ecklonia cava*, (a) Extraction protocol and (b) High Performance Liquide Chromatography (HPLC) analysis of Dieckol.**



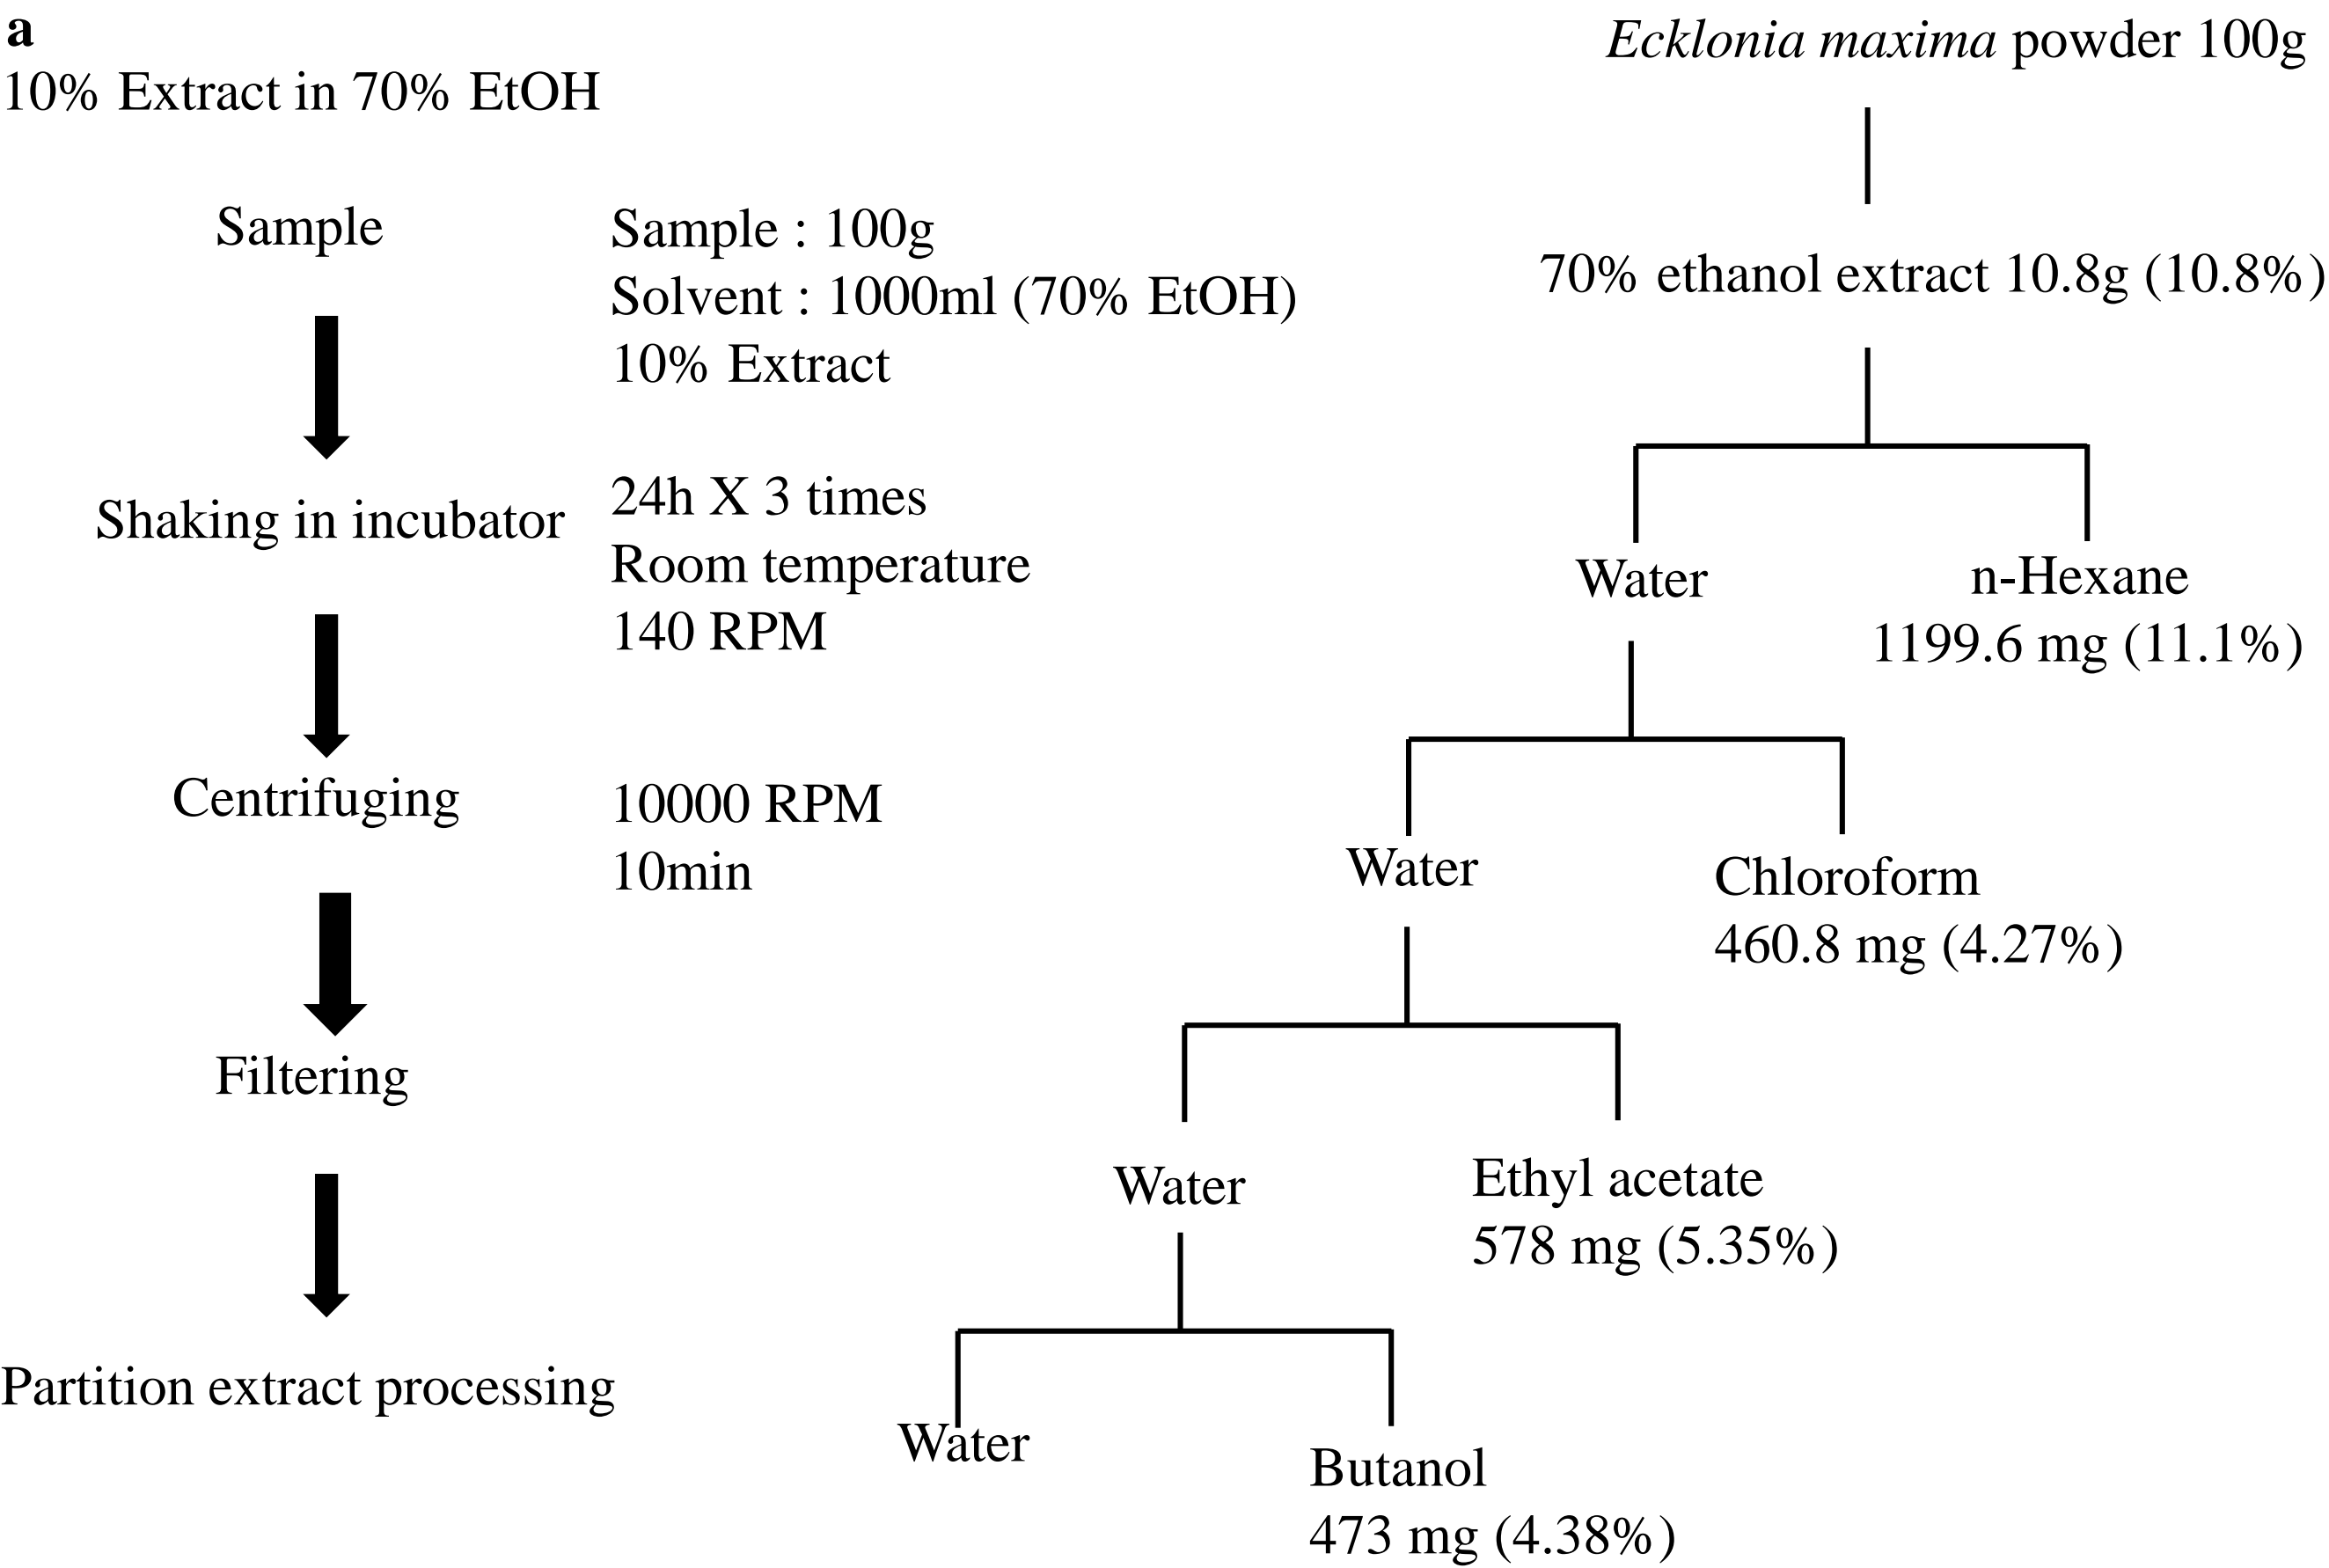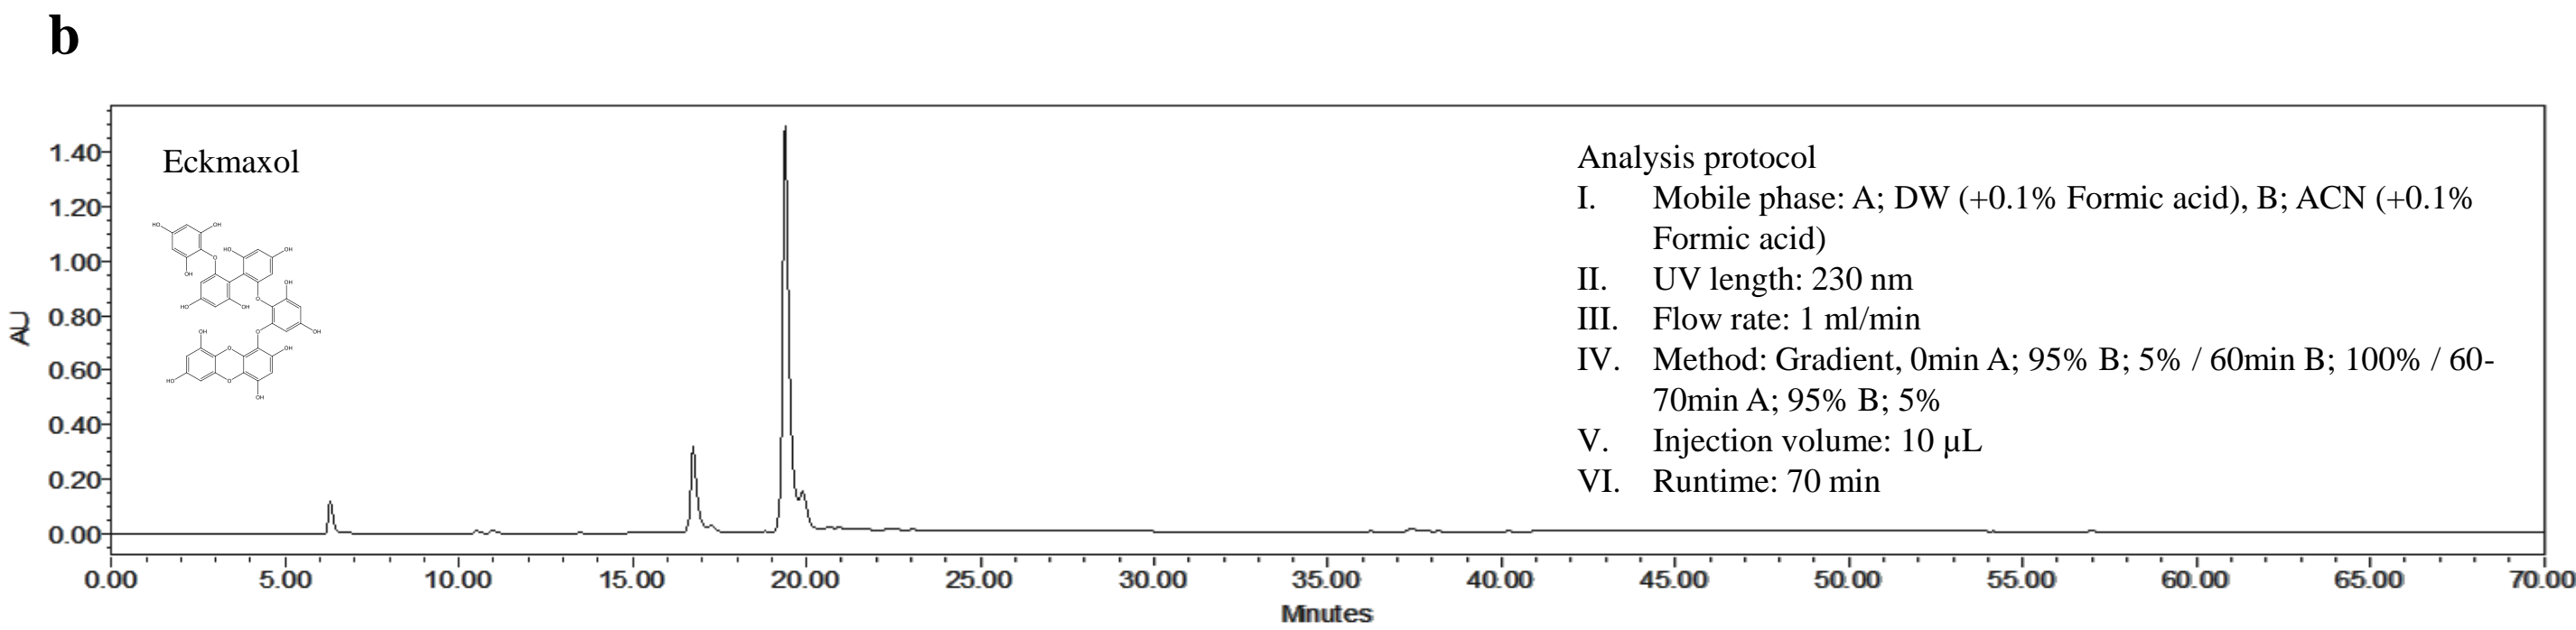

**Supplementary Figure S13. Extraction and isolation procedure of Eckmaxol from *Ecklonia maxima*, (a) Extraction protocol and (b) High Performance Liquide Chromatography (HPLC) analysis of Eckmaxol.**
